# Supplementary material for: Reaching Global Marine Biodiversity Conservation Goals With Area-Based Fisheries Management: A Typology-Based Evaluation
Source: Frontiers journal article supplement (doi:10.3389/fmars.2022.932283), 2022-07-22
Supplement: Data_Sheet_1.pdf [file Data_Sheet_1.pdf]

# Reaching global marine biodiversity conservation goals with area-based fisheries management: A typology-based evaluation

Amber Himes-Cornell, Juan Francisco Lechuga Sánchez, Caroline Potter, Clayton McKean, Jake Rice, Kim Friedman, Serge Garcia , Dave Fluharty

## *Supplemental material*

### APPENDIX A

#### **Definitions of the types of area-based fisheries management measures identified in the literature review**

*This table includes the definitions of the ABFM identified in Rice et al. (2018) as well as additional fisheries ABMT identified in the present literature review.*

| <b>Fisheries ABMT category</b> | <b>Definition</b>                                                                                                                                                                                                                                                                                                                                                                                                                                                                                                                                                                                                                                                                                                                                                                                                                                                                                                                                       |
|--------------------------------|---------------------------------------------------------------------------------------------------------------------------------------------------------------------------------------------------------------------------------------------------------------------------------------------------------------------------------------------------------------------------------------------------------------------------------------------------------------------------------------------------------------------------------------------------------------------------------------------------------------------------------------------------------------------------------------------------------------------------------------------------------------------------------------------------------------------------------------------------------------------------------------------------------------------------------------------------------|
| Benthic protected area         | Benthic Protected Areas (BPAs) are closures that are intended to provide benthic habitat protection by limiting or prohibiting direct fishing impacts usually related to bottom trawling (Spear and Cannon, 2012). For example, the Southern Indian Ocean Deepwater Fishers Association (SIODFA) uses BPAs to protect underwater topographic features, such as seamounts and hydrothermal vents and their associated ecosystems (SIODFA, 2016).                                                                                                                                                                                                                                                                                                                                                                                                                                                                                                         |
| Biosphere reserve              | Biosphere reserves are nominated by national governments and designated by UNESCO under the intergovernmental Man and Biosphere Programme. “Biosphere reserves are ‘learning places for sustainable development’. They are sites for testing interdisciplinary approaches to understanding and managing changes and interactions between social and ecological systems, including conflict prevention and management of biodiversity.” They include a core area that is strictly protected in order to contribute to the conservation of landscapes, ecosystems, species and genetic variation; a buffer zone which surrounds or adjoins the core area(s), and is used for activities compatible with sound ecological practices that can reinforce scientific research, monitoring, training and education; and a transition area where communities foster socio-culturally and ecologically sustainable economic and human activities. (UNESCO, n.d.) |

|                                              |                                                                                                                                                                                                                                                                                                                                                                                                                                                                                                                                                                                                                                                                                                                                                                |
|----------------------------------------------|----------------------------------------------------------------------------------------------------------------------------------------------------------------------------------------------------------------------------------------------------------------------------------------------------------------------------------------------------------------------------------------------------------------------------------------------------------------------------------------------------------------------------------------------------------------------------------------------------------------------------------------------------------------------------------------------------------------------------------------------------------------|
| Closed season (a.k.a. Seasonal closed areas) | <p>“Seasonal closed areas are common in fisheries management. A specific fishery or fishing gear is restricted only part of the year. The closure might apply to the entire fishing ground (and the area is implicit) or only part of it (and the area is duly geolocalized). The area and the time are usually the same every year, based on average time-space distribution of the element to be protected (spawners, recruits, migrating phases, endangered species, etc.). (modified from Garcia et al. 2019).</p>                                                                                                                                                                                                                                         |
| Community conserved area                     | <p>“Community-based closed areas tend to aim both at fisheries and biodiversity conservation. Only part of the fishable territory is closed, and not always to all fishing activities. Some areas within them may be no- take zones. These closures are usually established in the long-term but may be opened and closed either regularly or in exceptional conditions. The term “community” is taken here in a broad sense including Indigenous People communities, traditional communities, but also municipalities or other competent associative institutions (e.g., cooperatives, unions). The management responsibility may be shared with the central government (e.g., under co-management) or devolved to the “community”” (Garcia et al, 2019).</p> |
| Fishery reserve                              | <p>“Total closures for ecosystem management can also be implemented by fishing authorities for protection of some spatial ecosystem feature. These fishery “reserves” are often similar, in their intent, to MPAs (which, however, are cross-sectoral). Like MPAs, their effectiveness depends on the state of the resources before the measure, enforcement of special measures inside the area and, if resources move in and out of the closed area, on effectiveness of management outside the area” (Garcia et al., 2019).</p>                                                                                                                                                                                                                             |
| Fishery restricted area (FRA)                | <p>“Fishery Restricted Areas (FRAs) are multi-purpose spatial management tools used in the Mediterranean and Black Seas to protect marine resources and habitats (e.g., aggregations of vulnerable sponges, seamount areas, coral reef building formations, seagrass meadows, spawning grounds and reproduction sites for fish resources, etc.) from relevant fishing activities, in national or international waters, following criteria similar to those established for VMEs in the FAO deep-sea fisheries guidelines” (Garcia et al. 2019).</p>                                                                                                                                                                                                            |
| Fisheries sanctuary                          | <p>A fisheries sanctuary is a “critical habitat within which fishing is perpetually and completely prohibited. It is an important recognized tool of fisheries management for conservation, protection and restoration of fish species” (Ahmed et al., 2007). Fisheries sanctuaries generally use multi-use zoning measures to protect specific species and</p>                                                                                                                                                                                                                                                                                                                                                                                                |

|                             |                                                                                                                                                                                                                                                                                                                                                                                                                                                                                                                                                                                                                   |
|-----------------------------|-------------------------------------------------------------------------------------------------------------------------------------------------------------------------------------------------------------------------------------------------------------------------------------------------------------------------------------------------------------------------------------------------------------------------------------------------------------------------------------------------------------------------------------------------------------------------------------------------------------------|
|                             | <p>habitat during critical life stages, such as reproduction and growth, for sustainable use. These sanctuaries often have a core zone prohibiting from all fishing activities surrounded by buffer zones with less restrictive measures such as selected gear bans. These areas are frequently managed at the national level. Restrictions in sanctuaries vary by country with some nations prohibiting fishing entirely while restricted fishing may be allowed by others.</p>                                                                                                                                  |
| Gear ban                    | <p>Gear bans or restrictions are applied to spatially defined areas where specific fishing gear types, such as bottom-contact gear, are restricted or prohibited to protect the local ecosystem. Often other fishing methods are allowed in these areas.</p>                                                                                                                                                                                                                                                                                                                                                      |
| Locally Marine Managed Area | <p>Locally-managed Marine Areas (LMMA) often use local names (e.g., ra’hui, tabu area, kapu zone, sasizen, bau zone, tambu zone, etc.) and are managed largely or entirely by local communities often based on traditional tenure and management practices. The community may also designate a portion of their marine area as a temporary or permanent no-take zone where no fishing is allowed, providing additional protection and an increase of marine life in many cases (Rice et al. 2018).</p>                                                                                                            |
| Marine reserve              | <p>“Area of the sea in which all consumptive or extractive uses, including fishing, are effectively prohibited and other human interference is minimized to the extent practicable” (Dahlgren and Sobel, 2004).</p>                                                                                                                                                                                                                                                                                                                                                                                               |
| Marine sanctuary            | <p>The term marine sanctuary is often a synonym for an MPA; however, it has also been used differently in different national contexts. “For example, the term “sanctuary”, as used in the United States context, is a multiple-use MPA that is designated under the National Marine Sanctuary Program (e.g., Florida Keys National Marine Sanctuary). However, “sanctuary” takes on a very different meaning elsewhere – in the UK, the term has been used to refer to strictly protected marine reserves in which all extractive use is prohibited” (Dudley et al., 2008).</p>                                   |
| Marine Managed Areas        | <p>“Marine Managed Areas have been defined in various ways. In general, they aim at protection or management of marine resources (FGDC, undated). Other definitions may come closer to the definition of MPAs but differ significantly from it in that they MMAs may not be permanent but <i>“must provide the same protection, for any duration within a year, at the same location on the same dates each year, for at least two consecutive years</i>, even though they are expected to have continuity and the potential of permanence. In that sense, they are close to ABFMs. In the Pacific Ocean they</p> |

|                             |                                                                                                                                                                                                                                                                                                                                                                                                                                                                                                                                                                                                                                                                                                                                                                                                                                                                                                                                                                                                                                                                                                                                                        |
|-----------------------------|--------------------------------------------------------------------------------------------------------------------------------------------------------------------------------------------------------------------------------------------------------------------------------------------------------------------------------------------------------------------------------------------------------------------------------------------------------------------------------------------------------------------------------------------------------------------------------------------------------------------------------------------------------------------------------------------------------------------------------------------------------------------------------------------------------------------------------------------------------------------------------------------------------------------------------------------------------------------------------------------------------------------------------------------------------------------------------------------------------------------------------------------------------|
|                             | are typically considered as <i>areas of marine, estuarine, and adjacent terrestrial areas designated using federal, state, territorial, tribal, or local laws or regulations intended to protect, conserve, or otherwise manage a variety of resources and uses</i> . This indicates clearly that their governance may be centralized as well as partially or totally decentralized" (Rice et al. 2018).                                                                                                                                                                                                                                                                                                                                                                                                                                                                                                                                                                                                                                                                                                                                               |
| Marine Protected Area (MPA) | A protected area is: "A clearly defined geographical space, recognized, dedicated and managed, through legal or other effective means, to achieve the long-term conservation of nature with associated ecosystem services and cultural values" (Dudley et al., 2008). This definition applies to protected areas (PAs) both on land and in the ocean. However, IUCN has also specifically defined an MPA as "Any area of intertidal or subtidal terrain, together with its overlying water and associated flora, fauna, historical and cultural features, which has been reserved by law or other effective means to protect part or all of the enclosed environment" (Kelleher, 1999).                                                                                                                                                                                                                                                                                                                                                                                                                                                                |
| Moratorium                  | Moratoria are delays or suspensions of fishing activity for an entire fishery or specific sector. Rebuilding moratoria are used to address species which have been badly depleted or collapsed and other measures have not succeeded in rebuilding the stock. Moratoria may be in place indefinitely or until rebuilding has been completed (Rice et al. 2018; Garcia et al. 2019).                                                                                                                                                                                                                                                                                                                                                                                                                                                                                                                                                                                                                                                                                                                                                                    |
| Move-on rule                | "Move-on rules are mobile spatial tools that have limited roles as fisheries management tools for managing exploitation of the target species [...] In general move-on rules require set by set (individual tows, deployments of a long-line, etc.) monitoring of a fishery, with a specific trigger for action specified in advance. If the monitoring finds the catch of a specific set exceeds the trigger, the fishing in that immediate area stops and the vessel must move a specified distance before trying another fishing event. This continues until the monitoring shows that the trigger is no longer exceeded. The area is immediately signaled to the management authority and fishing is excluded in the area for all vessels. The exclusion may be temporary, e.g. when the trigger is about temporary coastal concentrations of juveniles or of a vulnerable bycatch species. It can be permanent, e.g. when the trigger refers to a permanent ecosystem element such as a coral or sponge reef (as for VMEs)" (Rice et al. 2018). The small areas identified through the move-on rule may be aggregated in a larger protected area. |

|                                           |                                                                                                                                                                                                                                                                                                                                                                                                                                                                                                                                                                                                                                                                                                                                                                                                         |
|-------------------------------------------|---------------------------------------------------------------------------------------------------------------------------------------------------------------------------------------------------------------------------------------------------------------------------------------------------------------------------------------------------------------------------------------------------------------------------------------------------------------------------------------------------------------------------------------------------------------------------------------------------------------------------------------------------------------------------------------------------------------------------------------------------------------------------------------------------------|
| National Park                             | A national park is defined by IUCN as a category II protected area that is a “large natural or near-natural areas protecting large-scale ecological processes with characteristic species and ecosystems, which also have environmentally and culturally compatible spiritual, scientific, educational, recreational and visitor opportunities” (Dudley et al, 2008).                                                                                                                                                                                                                                                                                                                                                                                                                                   |
| Real Time Closure                         | “Real-Time Closures (RTCs) are area-based measures advocated in dynamic fishery management that changes in space and time, implemented in near real-time in response to shifting oceanic and fisheries conditions” (Garcia et al, 2019).                                                                                                                                                                                                                                                                                                                                                                                                                                                                                                                                                                |
| Ring fencing                              | Ring-fencing delimits a boundary for fishing activities and prevents expansion of the fishery beyond this boundary. The intent is to restrict impacts on biodiversity to historically exploited areas to prevent further exploitation beyond these limits. Contrary to what happens usually, the protection is delivered <u>outside</u> the closed area (or fisheries’ footprint). Ring-fencing was voluntarily adopted by the South African hake trawl industry in 2008. A measure with a similar intent may be seen in the decision in 2005 by the General Fisheries Commission for the Mediterranean to prohibit the use of towed dredges and trawls below 1000 meters depth in the entire Mediterranean Sea with the aim of protecting little known deep-sea sensitive habitats (Rice et al. 2018). |
| Rotational closure                        | “Rotational closures involve temporary inter-annual and usually recurrent closures and re-opening of areas to specific fisheries or gears. In the long-term, all the areas involved in the rotational scheme areas are fished on some pre-established multi-year schedule. They are often used when efficient harvesting can take most of the stock in a local area and renewal of the stock takes several years. The length of the closed and open periods and the relative size of the open and closed areas are context-specific” (Garcia et al. 2019).                                                                                                                                                                                                                                              |
| Territorial use rights in fishing (TURF)  | “TURFs intend to remove the condition of common property of the resources in a territory, allocating use and management rights explicitly to its owner, which can be an individual, a private enterprise [...], a cooperative, association or community. A TURF may relate to the surface, the bottom, or to the entire water column within an area. [...]. The rights allocated to the TURF “owner” vary between countries and resources concerned” (Garcia et al. 2019).                                                                                                                                                                                                                                                                                                                              |
| Managed Vulnerable Marine Ecosystem (VME) | “Closures of areas because of the risks incurred by Vulnerable Marine Ecosystems (VMEs) [...] The UNGA                                                                                                                                                                                                                                                                                                                                                                                                                                                                                                                                                                                                                                                                                                  |

|  |                                                                                                                                                                                                                                                                                                                                                                                                                                                                                                       |
|--|-------------------------------------------------------------------------------------------------------------------------------------------------------------------------------------------------------------------------------------------------------------------------------------------------------------------------------------------------------------------------------------------------------------------------------------------------------------------------------------------------------|
|  | Resolutions have called on States to apply a precautionary approach to management of bottom-contacting gear with significant adverse impacts on VMEs, identifying the vulnerable areas based on transparent criteria (similar to EBSAs criteria) and adopting protection measures (including move-on rules and exclusion of impacting gear)” (Rice et al 2018). In this review, the term “managed VME” refers to VMEs for which such protection measures have been adopted and are being implemented. |
|--|-------------------------------------------------------------------------------------------------------------------------------------------------------------------------------------------------------------------------------------------------------------------------------------------------------------------------------------------------------------------------------------------------------------------------------------------------------------------------------------------------------|

## **References**

- Ahmed, K.K., Ahamed, S.U., Hasan, K.R. and Mustafa, M.G. (2007). Option for formulating community based fish sanctuary and its management in beel ecosystem in Brahmanbaria. *Bangladesh J. Fish.* 30:1-10.
- Dahlgren, C., & Sobel, J. 2004. *Marine reserves: a guide to science, design and use*. Island Press, Washington, DC, USA.
- Dudley, N. ed., 2008. Guidelines for applying protected area management categories. IUCN.
- Garcia, S. M., Rice, J., Friedman, K., and Himes-Cornell, A. (2019). Identification, Assessment, and Governance of Other Effective Area-Based Conservation Measures in the Marine Fishery Sector: A Background Document. Rome, Italy: Expert Meeting on OECMs in the Marine Fishery Sector.
- Kelleher, G. (1999) Guidelines for Marine Protected Areas. International Union for the Conservation of Nature, Gland, Switzerland.
- Rice, J.; Garcia, S.M, and Kaiser, M. (2018). Other effective area-based conservation measures (OEABCMs) used in marine fisheries: a working paper. Background information document for the CBD Expert Workshop on marine protected areas and other effective area-based conservation measures in coastal and marine areas (6-9/02/2018; Montreal, Canada). CBD/MCB/EM/2018/1/INF/4: 70 p
- SIODFA (2016). Southern Indian Ocean Deepwater Fisheries Association (SIODFA) Benthic Protected Areas in the Southern Indian Ocean. SIODFA Technical Report XVII 16/01. 40 p.
- Spear, B., and Cannon, J. (2012). Benthic protection areas: best practices and recommendations. Sustainable Fisheries Partnership Report. Sustainable Fisheries Partnership, Honolulu, HI, USA.
- UNESCO (n.d.). What are Biosphere Reserves? Accessed 8 April 2022 from: <https://en.unesco.org/biosphere/about>.

## APPENDIX B

### Case studies addressing areas/measures likely meeting all four OECM criteria

*The papers listed below are the 36 case studies that best meet all four OECM criteria.*

- Abbott, J.K., and Haynie, A.C. (2012). What are we protecting? Fisher behavior and the unintended consequences of spatial closures as a fishery management tool. *Ecological Applications*, 22(3), pp. 762-777.
- Ashford, O.S., Kenny, A.J., Barrio Froján, C.R., Downie, A.L., Horton, T., and Rogers, A.D. (2019). On the influence of Vulnerable Marine Ecosystem habitats on peracarid crustacean assemblages in the Northwest Atlantic Fisheries Organisation regulatory area. *Frontiers in Marine Science*, 6, 401.
- Beazley, L., Kenchington, E., Korabik, M., Fenton, D., and King, M. (2021). Other effective area-based conservation measure promotes recovery in a cold-water coral reef. *Global Ecology and Conservation*, 26, p.e01485.
- Beitl, C.M. (2017). Decentralized mangrove conservation and territorial use rights in Ecuador's mangrove-associated fisheries. *Bulletin of Marine Science*, 93(1), 117-136.
- Bennett, B. S. (2018). Effectiveness of Community-managed "Rest Areas" in Restoring a Population of Broadcast-Spawning Marine Invertebrates. Doctoral dissertation. Texas A&M University-Corpus Christi.
- Brillo, B.B., Elazegui, D., Cervantes, C., Rola, A. (2016). Assessing the formulation and implementation of the closed fishing season policy for sardines in Zamboanga Peninsula, Philippines. *Philippine Journal of Science*, 145(4), pp.395-404
- Calamia, M.A., Kline, D.I., Kago, S., Donovan, K., Dulunaqio, S., Tabaleka, T., and Mitchell, B.G. (2010). Marine-based community conserved areas in Fiji: An example of Indigenous governance and partnership. In K. W. Painemilla, A. B. Rylands, A. Woofter, and C. Hughes (Eds.), *Indigenous peoples and conservation: From rights to resource management*. Arlington, Conservation International.
- Cinner, J.E., Marnane, M.J., and McClanahan, T.R. (2005). Conservation and community benefits from traditional coral reef management at Ahus Island, Papua New Guinea. *Conservation Biology*, 19(6), pp.1714-1723.
- Fauna and Flora International, and East African Wildlife Society (2017) Marine resources co-management – lessons learned from Kenya: an Arcadia Marine case study. Fauna and Flora International, Cambridge, UK.
- Filous, A., Lennox, R.J., Beaury, J.P., Bagnis, H., Mchugh, M., Friedlander, A.M., Clua, E.E.G., Cooke, S.J., Fuller, T.K., Danylchuk, A.J. (2021). Fisheries science and marine education catalyze the renaissance of traditional management (rahui) to improve an artisanal fishery in French Polynesia. *Marine Policy*, 123, p.104291.
- Fuls, B.E. (1993). Closure Dates for the 1991 and 1992 Texas Gulf Shrimping Seasons. Management Data Series N. 104. Texas Parks and Wildlife Department, Fisheries Division, Coastal Fisheries Branch, Austin, Texas, USA.

- Gelcich, S., Fernández, M., Godoy, N., Canepa, A., Prado, L., and Castilla, J.C. (2012). Territorial user rights for fisheries as ancillary instruments for marine coastal conservation in Chile. *Conservation Biology*, 26(6), pp.1005-1015.
- Gell, F.R., and Roberts, C. (2003). The fishery effects of marine reserves and fishery closures. WWF-US, Washington, DC, USA.
- Hair, C., Foale, S., Daniels, N., Minimulu, P., Aini, J., and Southgate, P.C. (2020). Social and economic challenges to community-based sea cucumber mariculture development in New Ireland Province, Papua New Guinea. *Marine Policy*, 117, p.103940.
- Halliday, R.G. (1988). Use of seasonal spawning area closures in the management of haddock fisheries in the Northwest Atlantic. *NAFO Scientific Council Studies*, 12, pp.27-36.
- Halls, A.S., Mustafa, M.G., and Dickson, M. (2017). Community-based fisheries management approach adopted in Bangladesh. *Advances in Research* 11(6), pp.1-17.
- Hamilton, R., Gereniu, G., Kaniki, H. and Kereseka J. (2015). A report on periodic harvests at the Paspasbarego and Parama Locally Marine Managed Areas, Choiseul, Solomon Islands. The Nature Conservancy Pacific Division, Solomon Islands. 16 pp.
- Hamilton, R.J., Ramohia, P., Hughes, A., Siota, C., Kere, N., Giningele, M., Kereseka, J., Taniveke, F., Tanito, N., Atu, W., and L. Tanavalu (2007). Post-Tsunami Assessment of Zinoa Marine Conservation Area, South Choiseul, Solomon Islands. TNC Pacific Island Countries Report No. 4/07. The Nature Conservancy, Indo-Pacific Resource Centre, South Brisbane, Australia.
- James, P.S.B.R., and James, D.B. (1994). Conservation and management of sea-cucumber resources of India. In K. Rengarajan, and D.B. James (Eds.), *Proceedings of the National Workshop on Beche-de-mer*. Bulletin of the Central Marine Fisheries Research Institute Vol. 46, pp. 23-26. Central Marine Fisheries Research Institute, Cochin, India.
- Jupiter, S.D., Weeks, R., Jenkins, A. P., Egli, D.P., and Cakacaka, A. (2012). Effects of a single intensive harvest event on fish populations inside a customary marine closure. *Coral Reefs*, 31(2), pp.321-334.
- Kincaid, K.B., Rose, G.A. (2014). Why fishers want a closed area in their fishing grounds: exploring perceptions and attitudes to sustainable fisheries and conservation 10 years post closure in Labrador, Canada. *Marine Policy*, 46, pp.84-90.
- Long, S., Thurlow, G., Jones, P.J., Turner, A., Randrianantenaina, S.M., Gammage, T., Savage, J., Ndriamanja, J.R. (2019). Critical analysis of the governance of the Sainte Luce locally managed marine area (LMMA), southeast Madagascar. *Marine Policy*, p.103691.
- Matos-Caraballo, D., and Agar, J.J. (2011). Census of active commercial fishermen in Puerto Rico: 2008. *Marine Fisheries Review*, 73(1), pp.13-27.
- Meyer, C.G. (2003). An empirical evaluation of the design and function of a small marine reserve (Waikiki Marine Life Conservation District). Doctoral dissertation. University of Hawai'i.
- Miller, D.G.M., and Slicer, N.M. (2014). CCAMLR and Antarctic conservation: The leader to follow? In S. M. Garcia, J. Rice, and A. Charles (Eds.), *Governance of marine fisheries and biodiversity conservation: interaction and co-evolution*. John Wiley & Sons, Chichester, West Sussex, UK.



- Miller, E.A., Driggs, M.D., Desrosiers, M.E., and Yao, H.W. (2005). A critical evaluation of challenges to marine protected areas in Puerto Rico. Project Report. Worcester Polytechnic Institute.
- Miller, S.L. (2008). A Quantitative Assessment of Ra'ui (a Traditional Approach to Marine Protected Areas) on the Fishes and Invertebrates of Rarotonga, Cook Islands. Doctoral dissertation. Victoria University of Wellington.
- Nielsen, E., and Gjertsen, H. (2010). Case studies of three economic incentive approaches in marine conservation. Conservation International, Arlington, USA.
- Pascal N. (2011). Cost-Benefit analysis of community-based marine protected areas: 5 case studies in Vanuatu, South Pacific. Research report. CRISP-CRIOBE (EPHE/CNRS), Moorea, French Polynesia.
- Pawson, M.G., Pickett, G.D., and Smith, M.T. (2005). The role of technical measures in the recovery of the UK sea bass (*Dicentrarchus labrax*) fishery 1980–2002. *Fisheries research*, 76(1), pp.91-105.
- Saikliang, P. (2014). Development of closed seasons and areas in the Gulf of Thailand. *Journal of the Marine Biological Association of India*, 56(1), pp.70-76.
- Smolowitz, R., Siemann, L.A., Huntsberger, C., and Boelke, D. (2016). Application of seasonal closures to reduce flatfish bycatch in the US Atlantic sea scallop fishery. *Journal of shellfish research*, 35(2), pp.475-480.
- Steenbergen, D. (2013). Negotiating the future of local ‘backwaters’: Participatory marine conservation on small Islands in Eastern Indonesia. Doctoral dissertation. Murdoch University.
- Yıldız, T., Ulman, A., and Demirel, N. (2020). A comparison of market landings during fish spawning seasons to better understand the effectiveness of the temporal fishery closure in Turkey. *Ocean and Coastal Management*, 198, p.105353.
- Yu, J., Hu, Q., Yuan, H., Tong, F., Chen, P., and Mao, J. (2017). Effects assessment of summer fishing moratorium in Daya Bay in the Northern South China Sea. *Journal of Geoscience and Environment Protection*, 5(07), p.96.
- Yunitawati, D., and Clifton, J. (2019). Governance in the early stages of marine protected area development: A case study of Nusa Penida District Marine Conservation Area, Indonesia. *Marine Policy*, p.103653.

## APPENDIX C

### References related to case studies where marine fisheries are being managed with ABMTs

*Below is the full list of papers included in the final selection of the present literature review.*

- Abani, M.M. (2017). Assessment of Community Driven Eco-Tourism on Marine Resource Conservation: The Case Of Kuruwitu And Wasini. Master's thesis. Pwani University.
- Abbott, J.K., and Haynie, A.C. (2012). What are we protecting? Fisher behavior and the unintended consequences of spatial closures as a fishery management tool. *Ecological Applications*, 22(3), pp. 762-777.
- Abbott, J.K., Lloyd-Smith, P., Willard, D., and Adamowicz, W. (2018). Status-quo management of marine recreational fisheries undermines angler welfare. *Proceedings of the National Academy of Sciences*, 115(36), pp.8948-8953.
- Aburto, J.A., Gaymer, C.F., Haoa, S., and González, L. (2015). Management of marine resources through a local governance perspective: Re-implementation of traditions for marine resource recovery on Easter Island. *Ocean and Coastal Management*, 116, pp. 108-115.
- Aburto, J.A., Gaymer, C.F., and Govan, H. (2020). A large-scale marine protected area for the sea of Rapa Nui: From ocean grabbing to legitimacy. *Ocean and Coastal Management*, 198, p.105327.
- Achieng, S. (2019). Marine Protected Areas in Kenya: perceptions of local communities of costs and benefits of MPAs and their governance. Master's thesis. University of Cape Town
- Acosta, C.A. (2001). Assessment of the functional effects of a harvest refuge on Spiny Lobster and Queen Conch populations at Olover's Reef, Belize. *RLC Creswell, Proceedings of the 52nd Annual Gulf and Caribbean Fisheries Institute, Key West, Florida, 1-5 November*.
- Acosta, C.A. (2006). Impending trade suspensions of Caribbean queen conch under CITES: a case study on fishery impacts and potential for stock recovery. *Fisheries*, 31(12), 601-606.
- Adelaars, J., Bassett, M., Donlou, N., Marks, C., Pardieck, B., and Lindholm, J. (2012). Examining the Conservation Level of Marine management Areas within the Monterey Bay National Marine Sanctuary: How Protected is the Sanctuary? Marine Sanctuaries Conservation Series ONMS-12-04. U.S. Department of Commerce, National Oceanic and Atmospheric Administration, Office of National Marine Sanctuaries, Silver Spring, MD. 41 pp.
- Adom, D., Sekyere, P.A., and Yarney, L. (2019). A return to the Ghanaian cultural values of closed fishing season in Ghana's artisanal marine fishing: an essential means of restoring small pelagic fish stocks. *Transylvanian Review of Systematical and Ecological Research*, 21(3), 95-110.
- Agar, J., Shivilani, M., Fleming, C., and Solís, D. (2019). Small-scale fishers' perceptions about the performance of seasonal closures in the commonwealth of Puerto Rico. *Ocean and Coastal Management*, 175, 33-42.
- Aguirre-Muñoz, A., and Sánchez, F.M. (2017). The new Baja California Pacific Islands biosphere reserve sets a conservation benchmark: all Mexican Islands are now protected. *Fremontia*, 45(3), pp. 27-31.

- Ainley, D.G., and Pauly, D. (2014). Fishing down the food web of the Antarctic continental shelf and slope. *Polar Record*, 50(1), 92-107.
- Althaus, F., Williams, A., Alderslade, P., and Schlacher, T.A. (2017). Conservation of marine biodiversity on a very large deep continental margin: how representative is a very large offshore reserve network for deep-water octocorals?. *Diversity and Distributions*, 23(1), pp.90-103.
- Amali Infantina, J., Priya, P., Deepak Samuel, V.K., Abhilash, K. R., Purvaja, R., and Ramesh, R. (2020). Sustainability at a cost: An incentive analysis of “extended” fishing ban on the livelihoods of fishers of Tamil Nadu. *Fisheries Management and Ecology*, 27(4), pp. 336-344.
- Andersen, A.K.D. (2015). Impacts of area-based management on the population of northern shrimp, *Pandalus borealis* (Krøyer, 1838), in Isfjorden and Kongsfjorden, Svalbard. Master’s thesis. University of Akureyri.
- Andrachuk, M., Armitage, D., Hoang, H.D., and Van Le, N. (2018). Building blocks for social-ecological transformations. *Ecology and Society*, 23(2).
- Andreu-Cazenave, M., Subida, M.D., and Fernandez, M. (2017). Exploitation rates of two benthic resources across management regimes in central Chile: Evidence of illegal fishing in artisanal fisheries operating in open access areas. *Plos One*, 12(6), p.e0180012.
- Andrews, J., Groeneveld, J., and Pawson, M. (2013). *Surveillance Report South African Hake Trawl Fishery*. Intertek Fisheries Certification, Derby.
- Aragón-Noriega, E.A., Rodríguez-Quiroz, G., Cisneros-Mata, M.A., Ortega-Rubio, A. (2010). Managing a protected marine area for the conservation of critically endangered vaquita (*Phocoena sinus* Norris, 1958) in the Upper Gulf of California. *International Journal of Sustainable Development and World Ecology*, 17(5), pp.410-416.
- Arcos, J.M., and Oro, D. (1996). Changes in foraging range of Audouin's gulls *Larus audouinii* in relation to a trawler moratorium in the western Mediterranean. *Colonial Waterbirds*, 19(1), pp.128-131.
- Arias, N., and Stotz, W. (2020). Sustainability Analysis of the Benthic Fisheries Managed in the TURF System in Chile. *International Journal of the Commons*, 14(1), pp.344–365.
- Ashford, O.S., Kenny, A.J., Barrio Froján, C.R., Downie, A.L., Horton, T., and Rogers, A.D. (2019). On the influence of Vulnerable Marine Ecosystem habitats on peracarid crustacean assemblages in the Northwest Atlantic Fisheries Organisation regulatory area. *Frontiers in Marine Science*, 6, 401.
- Attwood, C.G., and Bennett, B.A. (1990). A simulation model of the sport-fishery for galjoen *Coracinus capensis*: an evaluation of minimum size limit and closed season. *South African Journal of Marine Science*, 9(1), pp.359-369.
- Augustave L.C. (2019) Governing for Viability: The Case of Velondriake Locally Managed Marine Area in Madagascar. In Chuenpagdee R., Jentoft S. (eds) *Transdisciplinarity for Small-Scale Fisheries Governance*. MARE Publication Series, vol 21. Springer, Cham.
- Ault, J.S., Smith, S.G., Bohnsack, J.A., Luo, J., Zurcher, N., McClellan, D.B., Ziegler, T.A., Hallac, D.E., Patterson, M., Feeley, M.W., Ruttenberg, B. I., Hunt, J., Kimball, D., and Causey, B. (2013). Assessing coral reef fish population and community changes in

- response to marine reserves in the Dry Tortugas, Florida, USA. *Fisheries Research*, 144, pp.28-37.
- Bailey, K.M. (2011). An empty donut hole: the great collapse of a North American fishery. *Ecology and Society*, 16(2).
- Balcells, M. (2016). Effect of a small-scale fishing closure area on the demersal community in the NW Mediterranean Sea. Master's thesis. Barcelona University.
- Barcina, K. (2020). Tide Pooling for a Solution: Strategic Communication to Strengthen the Pūpūkea Marine Life Conservation District. Capstone report. Scripps Institution of Oceanography.
- Barnes-Mauthe, M., Oleson, K.L., Brander, L.M., Zafindrasilivonona, B., Oliver, T.A., and van Beukering, P. (2015). Social capital as an ecosystem service: Evidence from a locally managed marine area. *Ecosystem Services*, 16, 283-293.
- Barr, J.M. (2006). Community-based sea turtle monitoring and management at Helen Reef, Hatohebei State, Republic of Palau. Master's thesis. Oregon State University.
- Barragán Paladines, M.J. (2015). Exploring governance in Galapagos Marine Reserve. Doctoral dissertation. Memorial University of Newfoundland.
- Barrett, L.T., de Lima, A., and Goetze, J.S. (2018). Evidence of a biomass hotspot for targeted fish species within Namena Marine Reserve, Fiji. *Pacific Conservation Biology*, 25(2), pp.204-207.
- Barrio Froján, C.R.S., MacIsaac, K.G., McMillan, A.K., del Mar Sacau Cuadrado, M., Large, P.A., Kenny, A.J., Kenchington, E., and de Cárdenas González, E. (2012). An evaluation of benthic community structure in and around the Sackville Spur closed area (Northwest Atlantic) in relation to the protection of vulnerable marine ecosystems. *ICES Journal of Marine Science*, 69(2), pp.213-222.
- Barrio Froján, C., Downie, A.L., Sacau Cuadrado, M., Kenchington, E., and Kenny, A. (2016). Evaluation of benthic assemblage structure in the NAFO regulatory area with regard to the protection of VME. *ICES Journal of Marine Science*, 73(2), pp.405-419.
- Barter, L. (2018). An investigation into Cambodia's first marine managed area: current state, strengths and areas for improvement. Master's thesis. University of Akureyri.
- Bauer, L.J., Kendall, M.S., and Jeffrey, C.F. (2008). Incidence of marine debris and its relationships with benthic features in Gray's Reef National Marine Sanctuary, Southeast USA. *Marine pollution bulletin*, 56(3), pp. 402-413.
- Bavinck, M., De Klerk, L., Van Dijk, D., Rothuizen, J.V., Blok, A. N., Bokhorst, J.R., van Haastrecht, E.K., van De Loo, T.J.C., Quaadvlieg, J.G.J., and Scholtens, J. (2008). Time-zoning for the safe-guarding of capture fisheries: A closed season in Tamil Nadu, India. *Marine Policy*, 32(3), pp.369-378.
- Beazley, L., Kenchington, E., Korabik, M., Fenton, D., and King, M. (2021). Other effective area-based conservation measure promotes recovery in a cold-water coral reef. *Global Ecology and Conservation*, 26, p.e01485.
- Beitl, C.M. (2017). Decentralized mangrove conservation and territorial use rights in Ecuador's mangrove-associated fisheries. *Bulletin of Marine Science*, 93(1), 117-136.
- Beitl, C.M., and Gaibor, N. (2019). Rights-based approaches in Ecuador's fishery for mangrove cockles. In J. Kitolelei, S. Einarsson, H.J. Lord, T. Ogawa (Eds.), *Global Conference on*

- Tenure and User Rights in Fisheries 2018: Achieving Sustainable Development Goals by 2030, Yeosu, Republic of Korea, 10–14 September 2018*. FAO Fisheries and Aquaculture Proceedings No. 64. Rome, FAO.
- Bell, C.M. (2010). Encounter norms of snorkelers and scuba divers at Molokini, Hawai'i: methodological and managerial applications. Master's thesis. Oregon State University.
- Benedet, R.A. (2017). The bottom longline fishery and its use as a source of benthic biodiversity information around South Georgia. Doctoral dissertation. Open University.
- Benjamin, C.C., Filipe, D.V., Pelligrino, J.S., and Robinson, E.G. (2006). Ecosystem-Based Management in Puerto Rican Communities. Project Report. Worcester Polytechnic Institute.
- Bennecke, S., and Metaxas, A. (2017). Effectiveness of a deep-water coral conservation area: Evaluation of its boundaries and changes in octocoral communities over 13 years. *Deep Sea Research Part II: Topical Studies in Oceanography*, 137, pp.420-435.
- Bennett, B.A., and Attwood, C.G. (1993). In defence of the de Hoop Marine Reserve. In Beckley, L.E. and R. P. Van der Elst (Eds.), *Fish, fishers, and fisheries proceedings of the second South African Marine Linefish Symposium, Durban 23-24 October 1992*. Special publication Oceanographic Research Institute 2. South Africa.
- Bennett, B. S. (2018). Effectiveness of Community-managed "Rest Areas" in Restoring a Population of Broadcast-Spawning Marine Invertebrates. Doctoral dissertation. Texas A&M University-Corpus Christi.
- Bennett, G.P. (2014). Trends and challenges for sustainable marine resource management for rural Solomon Islanders. Doctoral dissertation. University of Waikato.
- Berghoefer, U., Rozzi, R., and Jax, K. (2010). Many eyes on nature: diverse perspectives in the Cape Horn Biosphere Reserve and their relevance for conservation. *Ecology and Society*, 15(1).
- Bernton, H. (2009). "Global warming spurs commercial fishing moratorium in US Arctic". *Seattle Times*, February 5 [online]. Available at: <https://www.seattletimes.com/nation-world/global-warming-spurs-commercial-fishing-moratorium-in-us-arctic/>
- Berthold, S. (2016). The Fiji locally-managed marine area network: structure, strengths and scope for future developments. Master's thesis. University of Akureyri.
- Blackwell, B.D., Brumbaugh, D.R., and Dahlgren, C.P. (2013). Sustainable Finance Analysis for the South Berry Islands Marine Reserve. Nature Conservancy Northern Caribbean Program, Nassau, Bahamas, 53 pp.
- Blanco, M., Ospina-Álvarez, A., González, C., and Fernández, M. (2017). Egg production patterns of two invertebrate species in rocky subtidal areas under different fishing regimes along the coast of central Chile. *PloS one*, 12(5), p.e0176758.
- Boerder, K., Bryndum-Buchholz, A., and Worm, B. (2017). Interactions of tuna fisheries with the Galápagos marine reserve. *Marine Ecology Progress Series*, 585, pp.1-15.
- Bond, A.L., Montevecchi, W. A., Guse, N., Regular, P. M., Garthe, S., and Rail, J.F. (2012). Prevalence and composition of fishing gear debris in the nests of northern gannets (*Morus bassanus*) are related to fishing effort. *Marine Pollution Bulletin*, 64(5), pp.907-911.
- Bond, M.E., Valentin-Albanese, J., Babcock, E.A., Abercrombie, D., Lamb, N.F., Miranda, A., Pikitch, E.K., and Chapman, D.D. (2017). Abundance and size structure of a reef shark

- population within a marine reserve has remained stable for more than a decade. *Marine Ecology Progress Series*, 576, pp.1-10.
- Bonito, V., Simpson, R., and Waqairagata, F. (2011). Evaluating the Performance of LMMAS in the Districts of Korolevu-i-wai, Dawasamu and Nakorotubu. Technical Report.
- Bors, E.K., Rowden, A.A., Maas, E.W., Clark, M.R., and Shank, T.M. (2012). Patterns of deep-sea genetic connectivity in the New Zealand region: implications for management of benthic ecosystems. *PLoS One*, 7(11), p.e49474.
- Brillo, B.B., Elazegui, D., Cervantes, C., Rola, A. (2016). Assessing the formulation and implementation of the closed fishing season policy for sardines in Zamboanga Peninsula, Philippines. *Philippine Journal of Science*, 145(4), pp.395-404.
- Brillo, B.B.C., Jalotjot, H.C., Cervantes, C.C., and Rola, A.C. (2019). Impact on income and livelihood of fisheries workers: Closed fishing season policy for sardines in Zamboanga Peninsula, Philippines. *Journal of Coastal Conservation*, 23(6), pp.1057-1067.
- Brodie, W.B., Walsh, S.J., Maddock Parsons, D. (2010). An evaluation of the collapse and recovery of the yellowtail flounder (*Limanda ferruginea*) stock on the Grand Bank. *ICES Journal of Marine Science*, 67(9), pp.1887-1895.
- Bröker, K.C.A., Ilangakoon, A. (2008). Occurrence and conservation needs of cetaceans in and around the Bar Reef Marine Sanctuary, Sri Lanka. *Oryx*, 42(2), pp.286-291.
- Brondo, K.V., Bown, N. (2011). Neoliberal conservation, Garifuna territorial rights and resource management in the Cayos Cochinos Marine Protected Area. *Conservation and Society*, 9(2), pp.91-105.
- Brooks, C.M., Ainley, D. G., Abrams, P.A., Dayton, P.K., Hofman, R.J., Jacquet, J., and Siniff, D.B. (2018). Antarctic fisheries: factor climate change into their management. *Nature*, 558, pp.177-180
- Brooks, C.M., Chown, S.L., Douglass, L.L., Raymond, B.P., Shaw, J.D., Sylvester, Z.T., and Torrens, C.L. (2020). Progress towards a representative network of Southern Ocean protected areas. *PLoS One*, 15(4), p.e0231361.
- Brooks, F. (2013). Is bigger better? The impact of marine protected area expansion on community-based conservation. Master's thesis. Dalhousie University.
- Brown, J.A. (2001). A review of marine zones in the Monterey Bay National Marine Sanctuary. Marine Sanctuaries Conservation Series MSD-01-2. U.S. Department of Commerce, National Oceanic and Atmospheric Administration, Marine Sanctuaries Division, Silver Spring, MD.
- Brown, K.T. (2014). The scalloped hammerhead Shark, *Sphyrna lewini* (Griffith and Smith, 1834) in inshore waters in the Fiji Islands. Master's thesis. University of the South Pacific.
- Brown, P. (2013). Marine protected areas, co-management and livelihoods: Coastal change in Vietnam. Doctoral dissertation. University of Sydney.
- Bustamante, G., Canals, P., Di Carlo, G., Gomei, M., Romani, M., Souan, H., and Vanzella-Khouri, A. (2014). Marine protected areas management in the Caribbean and Mediterranean seas: making them more than paper parks. *Aquatic Conservation: Marine and Freshwater Ecosystems*, 24(S2), pp.153-165.

- Bustamante, R., Collins, K. J., and Bensted-Smith, R. (2000). Biodiversity conservation in the Galapagos marine reserve. *Bulletin de l'Institut Royal des Sciences Naturelles de Belgique*, 70, pp.31-38.
- Cáceres, I., Ibarra-García, E.C., Ortiz, M., Ayón-Parente, M., and Rodríguez-Zaragoza, F.A. (2020). Effect of fisheries and benthic habitat on the ecological and functional diversity of fish at the Cayos Cochinos coral reefs (Honduras). *Marine Biodiversity*, 50(1), pp.1-14.
- Cakacaka, A. (2007). The effects of tabu of fish and invertebrate abundance in a marine protected area: A case study of Navakavu, Suva, Fiji Islands. Master's thesis, University of the South Pacific.
- Cala, Y.R., de Jesús-Navarrete, A., Ocaña, F.A., and Oliva-Rivera, J. (2013). Density and reproduction of the Queen Conch *Eustrombus gigas* (Mesogastropoda: Strombidae) at Cabo Cruz, Desembarco del Granma National Park, Cuba. *Revista de biología tropical*, 61(2), pp.645-655.
- Calamia, M.A., Kline, D.I., Kago, S., Donovan, K., Dulunaqio, S., Tabaleka, T., and Mitchell, B.G. (2010). Marine-based community conserved areas in Fiji: An example of Indigenous governance and partnership. In K. W. Painemilla, A. B. Rylands, A. Woofter, and C. Hughes (Eds.), *Indigenous peoples and conservation: From rights to resource management*. Arlington, Conservation International.
- Cama, A., Bort, J., Christel, I., Vieites, D.R., and Ferrer, X. (2013). Fishery management has a strong effect on the distribution of Audouin's gull. *Marine Ecology Progress Series*, 484, pp.279-286.
- Camargo, C., Maldonado, J.H., Alvarado, E., Moreno-Sánchez, R., Mendoza, S., Manrique, N., Mogollón, A., Osorio, J. D., Grajales, A., Sánchez, J.A. (2009). Community involvement in management for maintaining coral reef resilience and biodiversity in southern Caribbean marine protected areas. *Biodiversity and Conservation*, 18(4), pp.935-956.
- Camhi, M. (1995). Industrial fisheries threaten ecological integrity of the Galapagos Islands. *Conservation Biology*, 9(4), pp.715-719.
- Campbell, S.J., Kartawijaya, T.A.S.R.I.F., Ardiwijaya, R.L., Mukmunin, A.H.M.A.D., Herdiana, Y., Rudi, E., and Nurvita, A. (2008). Fishing controls, habitat protection and reef fish conservation in Aceh. In D.O. Obura, J. Tamelander, and O. Linden, (Eds.) *Ten years after bleaching – facing the consequences of climate change in the Indian Ocean. CORDIO Status Report 2008*. Mombasa, Coastal Oceans Research and Development in the Indian Ocean and Sida-SAREC.
- Capezzuto, F., Ancona, F., Carlucci, R., Carluccio, A., Cornacchia, L., Maiorano, P., Pasquale, R., Sion, L., Tursi, A., D'Onghia, G. (2018). Cold-water coral communities in the Central Mediterranean: aspects on megafauna diversity, fishery resources and conservation perspectives. *Rendiconti Lincei. Scienze Fisiche e Naturali*, 29(3), pp. 589-597.
- Castilla, J.C., and Defeo, O. (2001). Latin American benthic shellfisheries: emphasis on co-management and experimental practices. *Reviews in Fish Biology and Fisheries*, 11(1), pp.1-30.
- Cesar, H. (2004). Background information on the institutional and regulatory framework of marine managed areas in the main Hawaiian Islands. Hawai'i Coral Reef Initiative.

- Chagaris, D., Allen, M., and Camp, E. (2019). Modeling temporal closures in a multispecies recreational fishery reveals tradeoffs associated with species seasonality and angler effort dynamics. *Fisheries Research*, 210, pp.106-120.
- Chan, C., Armitage, D., Alexander, S.M., and Campbell, D. (2019). Examining linkages between ecosystem services and social wellbeing to improve governance for coastal conservation in Jamaica. *Ecosystem Services*, 39, p.100997.
- Chan, E.H. (2010). A 16-year record of green and hawksbill turtle nesting activity at Chagar Hutang Turtle Sanctuary, Redang Island, Malaysia. *Indian Ocean Turtle News Letter*, 12, pp.1-5.
- Chang, N.N., Shiao, J. C., and Gong, G.C. (2012). Diversity of demersal fish in the East China Sea: Implication of eutrophication and fishery. *Continental Shelf Research*, 47, pp.42-54.
- Chapman, J. (2011). Status of Marine Resources in Bacalar Chico Marine Reserve 2011. Blue Ventures Conservation Report, Blue Ventures, London.
- Chen, Z., Xu, S., Qiu, Y., Lin, Z., and Jia, X. (2009). Modeling the effects of fishery management and marine protected areas on the Beibu Gulf using spatial ecosystem simulation. *Fisheries Research*, 100(3), pp.222-229.
- Chimienti, G., and Mastrototaro, F. (2019). Searching for black corals: The exploration of Tremiti islands MPA. *Rapp. Comm. Mer. Médit*, 42, p.268.
- Cinner, J.E., Marnane, M.J., and McClanahan, T.R. (2005). Conservation and community benefits from traditional coral reef management at Ahus Island, Papua New Guinea. *Conservation Biology*, 19(6), pp.1714-1723.
- Cinner, J.E., Lau, J.D., Bauman, A.G., Feary, D.A., Januchowski-Hartley, F.A., Rojas, C.A., Barnes, M. L., Bergseth, B.J., Shum, E., Lahari, R., Ben, J., Graham, N.A.J. (2019). Sixteen years of social and ecological dynamics reveal challenges and opportunities for adaptive management in sustaining the commons. *Proceedings of the National Academy of Sciences*, 116(52), pp.26474-26483.
- Clarke, C.J. (2009). Marine Managed Areas in the Human Cultural Context. Master's project. Duke University.
- Clarke, J. (2017). The role of spatial measures in the management and conservation of marine fish and invertebrates. Doctoral dissertation. University of Glasgow.
- Clarke, P., and Jupiter, S. D. (2010). Law, custom and community-based natural resource management in Kubulau District (Fiji). *Environmental Conservation*, 37(1), pp.98-106.
- Clements, C., Bonito, V., Grober-Dunsmore, R., and Sobey, M. (2012). Effects of small, Fijian community-based marine protected areas on exploited reef fishes. *Marine Ecology Progress Series*, 449, pp.233-243.
- Clifton, J., Osman, E.O., Suggett, D.J., and Smith, D.J. (2019). Resolving conservation and development tensions in a small island state: A governance analysis of Curieuse Marine National Park, Seychelles. *Marine Policy*, p.103617.
- Colwell, J.M.N., Axelrod, M., and Roth, B. (2019). Unintended consequences of a seasonal ban on fishing effort in Tamil Nadu and Puducherry, India. *Fisheries Research*, 212, pp.72-80.
- Constable, A.J., Welsford, D.C. (2011). Developing a precautionary, ecosystem approach to managing fisheries and other marine activities at Heard Island and McDonald Islands in the Indian Sector of the Southern Ocean. In G. Duhamel, and D. Welsford (Eds.) *The*



- Kerguelen Plateau: Marine Ecosystem and Fisheries*. Proceedings of the Second Symposium.
- Cortés-Useche, C., Hernández-Delgado, E.A., Calle-Triviño, J., Blasco, R.S., Galván, V., and Arias-González, J.E. (2021). Conservation actions and ecological context: optimizing coral reef local management in the Dominican Republic. *PeerJ*, 9, p.e10925.
- Cortes-Vazquez, J.A. (2014). A natural life: neo-rurals and the power of everyday practices in protected areas. *Journal of Political Ecology*, 21(1), 493-515.
- Cox, C., and Hunt, J.H. (2005). Change in size and abundance of Caribbean spiny lobsters *Panulirus argus* in a marine reserve in the Florida Keys National Marine Sanctuary, USA. *Marine Ecology Progress Series*, 294, pp.227-239.
- Crawford, B., Herrera, M.D., Hernandez, N., Leclair, C. R., Jiddawi, N., Masumbuko, S., and Haws, M. (2010). Small scale fisheries management: lessons from cockle harvesters in Nicaragua and Tanzania. *Coastal Management*, 38(3), pp.195-215.
- Cresswell, A.K., Langlois, T.J., Wilson, S.K., Claudet, J., Thomson, D.P., Renton, M., Fulton, C.J., Fisher, R., Vanderklift, M.A., Babcock, R.C., Stuart-Smith, R.D., Haywood, M.D.E., Depczynski, M., Westera, M., Ayling, A.M., Fitzpatrick, B., Halford, A.R., McLean, D.L., Pillans, R.D., Cheal, A.J., Tinkler, P., Edgar, G.J., Graham, N.A.J., Harvey, E.S., Holmes, T.H. (2019). Disentangling the response of fishes to recreational fishing over 30 years within a fringing coral reef reserve network. *Biological Conservation*, 237, pp.514-524.
- Cripps, G., and Harris, A. (2009). Community creation and management of the Velondriake marine protected area. Blue Ventures Conservation Report. Blue Ventures Conservation, London.
- D’Onghia, G., Calculi, C., Capezzuto, F., Carlucci, R., Carluccio, A., Grehan, A., Indennitate, A. Maiorano, P., Mastrototaro, F. Pollice, A., Russo, T., Savini, A., Sion, L., Tursi, A. (2017). Anthropogenic impact in the Santa Maria di Leuca cold-water coral province (Mediterranean Sea): observations and conservation straits. *Deep Sea Research Part II: Topical Studies in Oceanography*, 145, pp.87-101.
- D’Onghia, G., Sion, L., and Capezzuto, F. (2019). Cold-water coral habitats benefit adjacent fisheries along the Apulian margin (central Mediterranean). *Fisheries Research*, 213, pp.172-179.
- Davidson, R.J., Villouta, E., Cole, R.G., and Barrier, R.G.F. (2002). Effects of marine reserve protection on spiny lobster (*Jasus edwardsii*) abundance and size at Tonga Island Marine Reserve, New Zealand. *Aquatic Conservation: Marine and Freshwater Ecosystems*, 12(2), pp.213-227.
- Davies, K. (2016). Changing tides—a South Pacific study. *Journal of South Pacific Law*, 2016(2), pp.104-146.
- Davis, B.C., and Moretti, G. (2005). Enforcing US marine protected areas: synthesis report. National Oceanic and Atmospheric Administration, National Marine Protected Areas Center, Silver Spring, Maryland
- Day, J. (2008). The need and practice of monitoring, evaluating and adapting marine planning and management—lessons from the Great Barrier Reef. *Marine policy*, 32(5), pp.823-831.
- De Carvalho, A.N., Vaz, A.S.L., Sérgio, T.I.B., and dos Santos, P.J.T. (2013). Sustainability of bait fishing harvesting in estuarine ecosystems—Case study in the Local Natural Reserve of

- Douro Estuary, Portugal. *Revista de Gestão Costeira Integrada-Journal of Integrated Coastal Zone Management*, 13(2), pp.157-168.
- De Juan, S., Subida, M.D., Gelcich, S., and Fernandez, M. (2018). Ecosystem health in coastal areas targeted by small-scale artisanal fisheries: Insights on monitoring and assessment. *Ecological Indicators*, 88, pp.361-371.
- Dee, L.E., Horii, S.S., and Thornhill, D.J. (2014). Conservation and management of ornamental coral reef wildlife: successes, shortcomings, and future directions. *Biological Conservation*, 169, pp.225-237.
- Defeo, O., Castrejón, M., Pérez-Castañeda, R., Castilla, J.C., Gutiérrez, N.L., Essington, T.E., and Folke, C. (2016). Co-management in Latin American small-scale shell fisheries: assessment from long-term case studies. *Fish and Fisheries*, 17(1), pp.176-192.
- Delaney, J.M. (2003). Community capacity building in the designation of the Tortugas Ecological Reserve. *Gulf and Caribbean Research*, 14(2), pp.163-169.
- Deledda-Tramoni, G., and Gaertner, D. (2019). Assessing the effectiveness of the current moratorium on FADs using conventional tagging data from the AOTTP-preliminary results. *Collective Volume of Scientific Papers ICCAT*, 76(6), pp.126-138.
- Delisle A, Namakin B, Uriam T, Campbell B and Hanich Q. 2016. *Participatory diagnosis of coastal fisheries for North Tarawa and Butaritari island communities in the Republic of Kiribati*. Program Report: 2016-24. WorldFish, Penang.
- Dimarchopoulou, D., Dogrammatzi, A., Karachle, P.K., and Tsikliras, A.C. (2018). Spatial fishing restrictions benefit demersal stocks in the northeastern Mediterranean Sea. *Scientific reports*, 8(1), pp.1-11.
- Diz, D., Johnson, D., Riddell, M., Rees, S., Battle, J., Gjerde, K., Henninge, S., Roberts, J.M. (2018). Mainstreaming marine biodiversity into the SDGs: the role of other effective area-based conservation measures (SDG 14.5). *Marine Policy*, 93, pp.251-261.
- Dorfman, D.S., and Battista, T.A. (2011). Gap Analysis of Marine Ecosystem Data for the Department of Interior: National Park Service Inventory and Monitoring Program. NOAA National Ocean Service, National Centers for Coastal Ocean Science, Silver Spring, MD.
- Duan, L., Li, S., Liu, Y., Wang, Y., Failler, P., Christensen, V., and Moreau, J. (2010). Simulating the Effect of Seasonal Fishing Moratorium on the Pearl River Estuary Coastal Ecosystem for Fisheries Strategies Exploration. In A. L. Shriver (Ed.), *proceedings of the Fifteenth Biennial Conference of the International Institute of Fisheries Economics & Trade, July 13-16, 2010, Montpellier, France: Economics of Fish Resources and Aquatic Ecosystems: Balancing Uses, Balancing Costs*. International Institute of Fisheries Economics & Trade, Corvallis, Oregon.
- Duarte de Paula Costa, M., Mills, M., Richardson, A. J., Fuller, R. A., Muelbert, J. H., and Possingham, H. P. (2018). Efficiently enforcing artisanal fisheries to protect estuarine biodiversity. *Ecological Applications*, 28(6), pp.1450-1458.
- Dumas, P., Ham, J., Kaku, R., William, A., Kaltavara, J., Gereva, S., and Léopold, M. (2017). Tectus (Trochus) niloticus search for suitable habitats can cause equivocal benefits of protection in village-based marine reserves. *Plos one*, 12(5), p.e0176922.

- Dunne, R.P., Polunin, N.V., Sand, P.H., and Johnson, M.L. (2014). The Creation of the Chagos Marine Protected Area: A Fisheries Perspective. *Advances in marine biology*, 69, pp.79-127.
- Durán-Muñoz, P., Murillo, F.J., Serrano-López, A., Sayago-Gil, M., Parra, S., Díaz del Río, V., Sacau, M., Patrocinio, T., Cristobo, J. A Case Study of available methodology for the identification of Vulnerable Ecosystems/Habitats in bottom deep-sea fisheries: Possibilities to apply this method in the NAFO Regulatory Area in order to select Marine Protected Areas. NAFO SCR Doc. No. 6, Serial No. N5491pg. 20.
- Durbin, T. J. (2015). Big Ocean: Marine Conservation, Bureaucratic Practice, and the Politics of Vagueness in the Pacific Islands. Doctoral dissertation. Rice University.
- Dutra, G.F., Camargo, E., Santos, C.A.P.D., and Ceotto, P. (2011). Abrolhos: challenges for the conservation and sustainable development of the area that encompasses the largest marine biodiversity in the southern Atlantic. *Field Actions Science Reports*, Special issue 3.
- Edgar, G.J., Stuart-Smith, R.D., Thomson, R.J., and Freeman, D.J. (2017). Consistent multi-level trophic effects of marine reserve protection across northern New Zealand. *PLoS One*, 12(5), p.e0177216.
- Edyvane, K., de Carvalho, N., Penny, S., Fernandes, A., de Cunha, C.B., Amaral A.L., Mendes M., Pinto P. (2012). Conservation Values, Issues and Planning in the Nino Konis Santana Marine Park, Timor Leste – Final Report. Project 4 of the Timor Leste Coastal-Marine Habitat Mapping, Tourism and Fisheries Development Project. Ministry of Agriculture and Fisheries, Government of Timor Leste.
- Eerkes-Medrano, D., Drewery, J., Burns, F., Cárdenas, P., Taite, M., McKay, D. W., Stirling, D., Neat, F. (2020). A community assessment of the demersal fish and benthic invertebrates of the Rosemary Bank Seamount marine protected area (NE Atlantic). *Deep Sea Research Part I: Oceanographic Research Papers*, 156, p.103180.
- Egli, D.P., Tui, T., Jupiter, S.D., and Caginitoba, A. (2010). Perception surveys of coastal resource use and changes following establishment of a marine protected area network in Kubulau, Fiji. Technical Report, (07/10). Wildlife Conservation Society-Fiji, Suva, Fiji. 16 pp.
- Elferink, A.G.O. (1995). Fisheries in the Sea of Okhotsk High Seas Enclave-The Russian Federation's Attempts at Coastal State Control. *The International Journal of Marine and Coastal Law*, 10(1), pp.1-18.
- Eliassen, S.Q. (2014). Cod avoidance by area regulations in Kattegat—experiences for the implementation of a discard ban in the EU. *Marine Policy*, 45, pp.108-113.
- Evans, S.M., Gill, M.E., Retraubun, A. S. W., Abrahamz, J., and Dangeubun, J. (1997). Traditional management practices and the conservation of the gastropod (*Trochus niloticus*) and fish stocks in the Maluku Province (eastern Indonesia). *Fisheries Research*, 31(1-2), pp.83-91.
- Fache, E., and Breckwoldt, A. (2018). Small-scale managed marine areas over time: Developments and challenges in a local Fijian reef fishery. *Journal of environmental management*, 220, pp.253-265.
- Fagín, E. (2015). Assessing the effects of a fishing protection zone on fish assemblages. Roses Bay's case study (NW Mediterranean Sea). Master's thesis. University of Barcelona.

- Fauna and Flora International, and East African Wildlife Society (2017) Marine resources co-management – lessons learned from Kenya: an Arcadia Marine case study. Fauna and Flora International, Cambridge, UK.
- Fernández, G.G., and Friman, E. (2011). New marine commons along the Chilean coast—the management areas (MAs) of Peñuelas and Chigualoco. *International Journal of the Commons*, 5(2).
- Fernández, M., Blanco, M., Ruano-Chamorro, C., and Subida, M.D. (2017). Reproductive output of two benthic resources (*Fissurella latimarginata* and *Loxechinus albus*) under different management regimes along the coast of central Chile. *Latin American Journal of Aquatic Research*, 45(2), pp.391-402.
- Filous, A., Lennox, R.J., Beaury, J.P., Bagnis, H., Mchugh, M., Friedlander, A.M., Clua, E.E.G., Cooke, S.J., Fuller, T.K., Danylchuk, A.J. (2021). Fisheries science and marine education catalyze the renaissance of traditional management (rahui) to improve an artisanal fishery in French Polynesia. *Marine Policy*, 123, p.104291.
- Flores Martin, N. (2020). Taking the Initiative on Maltese Trawl Industry Management. Industry and Science Collaboration on Identifying Nursery and Spawning Areas for Trawl Fisheries Target Species. In P. Holm, M. Hadjimichael, S. Linke, and S. Mackinson (Eds.), *Collaborative Research in Fisheries* [MARE Publication Series, 22]. Springer, Cham.
- Flower, K.R., Atkinson, S., Brainard, R., Courtney, C.A., Parker, B.A.A., Parks, J.E., Pomeroy, R. S., White, A.T. (2013). Toward ecosystem-based coastal area and fisheries management in the Coral Triangle: Integrated strategies and guidance. Coral Triangle Initiative Support Program for the U.S. Agency for International Development, Jakarta, Indonesia.
- Fonteneau, A., Gaertner, D., Maufroy, A., and Amandè, J. (2016). Effects of the ICCAT FAD moratorium on the tuna fisheries and tuna stocks. *Collective Volume of Scientific Papers*, 72(2), pp.520-533.
- Foo, S.A., Walsh, W. J., Lecky, J., Marcoux, S., and Asner, G.P. (2021). Impacts of pollution, fishing pressure, and reef rugosity on resource fish biomass in West Hawaii. *Ecological Applications*, 31(1), p.e2213.
- Ford, A. K., Eich, A., McAndrews, R.S., Mangubhai, S., Nugues, M.M., Bejarano, S., Moore, B.R., Rico, C., Wild, C., Ferse, S. C. A. (2018). Evaluation of coral reef management effectiveness using conventional versus resilience-based metrics. *Ecological Indicators*, 85, pp.308-317.
- Fox, M., Naisilisili, W., Batibasaga, A., and Jupiter, S. (2012). Opportunities and challenges of managing spawning aggregations in Fiji. In D. Yellowless, and T. P. Hughes (Eds.), *Proceedings of the 12th International Coral Reef Symposium*. James Cook University, Cairns, Australia.
- Friedlander, A.M., Shackeroff, J.M., and Kittinger, J.N. (2013). Customary marine resource knowledge and use in contemporary Hawai ‘i 1. *Pacific Science*, 67(3), pp.441-460.
- Friedlander, A.M., Wagner, D., Gaymer, C.F., Wilhelm, T. A., Lewis, N.A., Brooke, S., Kikiloi, K., Varmer, O. (2016). Co-operation between large-scale MPAs: Successful experiences

- from the Pacific Ocean. *Aquatic Conservation: Marine and Freshwater Ecosystems*, 26, pp.126-141.
- Frisch, A. J., Hobbs, J. P.A., Hansen, S.T., Williamson, D.H., Bonin, M.C., Jones, G.P., and Rizzari, J.R. (2019). Recovery potential of mutualistic anemone and anemonefish populations. *Fisheries research*, 218, pp.1-9.
- Fujita, R., Epstein, L., Battista, W., Karr, K., Higgins, P., Landman, J., and Carcamo, R. (2017). Scaling territorial use rights in fisheries (TURFs) in Belize. *Bulletin of Marine Science*, 93(1), pp.137-153.
- Fuls, B.E. (1993). Closure Dates for the 1991 and 1992 Texas Gulf Shrimping Seasons. Management Data Series N. 104. Texas Parks and Wildlife Department, Fisheries Division, Coastal Fisheries Branch, Austin, Texas, USA.
- Gallacher, J., Simmonds, N., Fellowes, H., Brown, N., Gill, N., Clark, W., Biggs, C., Rodwell, L.D. (2016). Evaluating the success of a marine protected area: a systematic review approach. *Journal of environmental management*, 183, pp.280-293.
- Gamboa-Álvarez, M.Á., López-Rocha, J.A., and Poot-López, G.R. (2015). Spatial analysis of the abundance and catchability of the red octopus *Octopus maya* (Voss and Solis-Ramírez, 1966) on the continental shelf of the Yucatán peninsula, México. *Journal of Shellfish Research*, 34(2), pp.481-492.
- Garcés-García, K.C., Tovar-Ávila, J., Vargas-Trejo, B., Chávez-Arrenquín, D.A., Walker, T.I., and Day, R.W. (2020). Elasmobranch bycatch by prawn trawls in the Gulf of California: First comprehensive analysis and the effect of fish escape devices. *Fisheries Research*, 230, p.105639.
- Gardner, C.J., Cripps, G., Day, L.P., Dewar, K., Gough, C., Peabody, S., Tahindraza, G., Harris, A. (2020). A decade and a half of learning from Madagascar's first locally managed marine area. *Conservation Science and Practice*, 2(12), p.e298.
- Garnier, J., Hill, N., Guissamulo, A., Silva, I., Witt, M., and Godley, B. (2012). Status and community-based conservation of marine turtles in the northern Querimbas Islands (Mozambique). *Oryx*, 46(3), pp.359-367.
- Gavaris, S., Porter, J.M., Stephenson, R.L., Robert, G., and Pezzack, D.S. (2005). Review of management plan conservation strategies for Canadian fisheries on Georges Bank: a test of a practical ecosystem-based framework. ICES CM 2005/BB:05, 21 pp.
- Gaymer, C.F., and Aburto, J.A. (2020). Conservation of Rapa Nui waters strongly supported by publications in Aquatic Conservation. *Aquatic Conservation: Marine and Freshwater Ecosystems*, 30(9), pp.1765-1769.
- Geange, S.W., Rowden, A.A., Nicol, S., Bock, T., and Cryer, M. (2020). A data-informed approach for identifying move-on encounter thresholds for vulnerable marine ecosystem indicator taxa. *Frontiers in Marine Science*, 7, p.155.
- Gelcich, S., Fernández, M., Godoy, N., Canepa, A., Prado, L., and Castilla, J.C. (2012). Territorial user rights for fisheries as ancillary instruments for marine coastal conservation in Chile. *Conservation Biology*, 26(6), pp.1005-1015.
- Gelcich, S., Cinner, J., Donlan, C. J., Tapia-Lewin, S., Godoy, N., and Castilla, J.C. (2017). Fishers' perceptions on the Chilean coastal TURF system after two decades: problems, benefits, and emerging needs. *Bulletin of Marine Science*, 93(1), pp.53-67.

- Gell, F.R., and Roberts, C. (2003). The fishery effects of marine reserves and fishery closures. WWF-US, Washington, DC, USA.
- Gianni, M., Currie, D.E.J., Fuller, S., Speer, L., Ardron, J., Weeber, B., Gibson, M., Roberts, G., Sack, K., Owen, S., Kavanagh, A. (2011). Unfinished business: a review of the implementation of the provisions of UNGA resolutions 61/105 and 64/72 related to the management of bottom fisheries in areas beyond national jurisdiction. Deep Sea Conservation Coalition.
- Gibson, J., Day, J., Dobbs, K., and Molloy, F. (2012). Great Barrier Reef Region Strategic Assessment. In H. von Nordheim, K. Maschner and K. Wollny-Goerke (Eds.), *Progress in Marine Conservation in Europe 2012, Proceedings of the Symposium Stralsund, Germany 18 - 22 June 2012*. BfN-Skripten 339. Federal Agency for Nature Conservation, Bonn, Germany.
- Gilchrist, H., Roccliffe, S., Anderson, L.G., Gough, C.L. (2020). Reef fish biomass recovery within community-managed no take zones. *Ocean and Coastal Management*, 192, 105210.
- Godínez Domínguez, E., Freire, J., and González Sansón, G. (2002). Predicting changes to macrobenthic communities due to fishing disturbance in a shrimp fishing ground of the Mexican central Pacific.
- Goetze, J., Langlois, T., Claudet, J., Januchowski-Hartley, F., and Jupiter, S.D. (2016). Periodically harvested closures require full protection of vulnerable species and longer closure periods. *Biological Conservation*, 203, pp.67-74.
- González, J.E., Yannicelli, B., and Stotz, W. (2021). The interplay of natural variability, productivity and management of the benthic ecosystem in the Humboldt Current System: Twenty years of assessment of *Concholepas concholepas* fishery under a TURF management system. *Ocean and Coastal Management*, 208, p.105628.
- Govan, H. (2011). Good coastal management practices in the Pacific: experiences from the field. Secretariat of the Pacific Regional Environment Programme, Apia, Samoa.
- Govan, H., Jupiter, S., and Comley, J. (2012). Recognition and support of ICCAs in Fiji. In A. Kothari, C. Corrigan, H. Jonas, A. Neumann, and Shrumm, H. (Eds.), *Recognising and Supporting Territories and Areas Conserved by Indigenous Peoples and Local Communities: Global Overview and National Case Studies*. Technical Series no. 64. Secretariat of the Convention on Biological Diversity, ICCA Consortium, Kalpavriksh, and Natural Justice, Montreal, Canada.
- Granek, E.F., and Brown, M.A. (2005). Co-management approach to marine conservation in Mohéli, Comoros Islands. *Conservation biology*, 19(6), pp.1724-1732.
- Grieve, C. (2009). Environmental and social criteria for allocating access to fisheries resources. Pew Environment Group.
- Grizzle, R.E. (2008). Intensive Study of the Western Gulf of Maine Closure Area. Cooperative Research Project Final Report. Northeast Consortium.
- Grober-Dunsmore, R., and Alicea, E. (2009). Findings from acoustic tagging reveal community based MPA in Fiji affords reasonable protection to Lethrinids. Proceedings of the Inaugural Fiji Islands Conservation Science Forum, Suva, Fiji.

- Grupe, B., and Norgard, T. (2018). Offshore protected areas: Canada's oldest marine protected area and newest area of interest. In P.C Chandler, S.A. King, and J. Boldt (Eds.), *State of the physical, biological and selected fishery resources of Pacific Canadian marine ecosystems in 2017*. Canadian Technical Report of Fisheries and Aquatic Sciences 3266. Fisheries & Oceans Canada, Nanaimo, Canada.
- Guidetti, P., and Claudet, J. (2010). Comanagement practices enhance fisheries in marine protected areas. *Conservation Biology*, 24(1), pp.312-318.
- Gullestad, P., Blom, G., Bakke, G., and Bogstad, B. (2015). The "Discard Ban Package": Experiences in efforts to improve the exploitation patterns in Norwegian fisheries. *Marine Policy*, 54, pp.1-9.
- Haggarty, Dana R., Jonathan B. Shurin, and K. Lynne Yamanaka. "Assessing population recovery inside British Columbia's Rockfish Conservation Areas with a remotely operated vehicle." *Fisheries Research*, 183, pp.165-179.
- Hair, C., Foale, S., Daniels, N., Minimulu, P., Aini, J., and Southgate, P.C. (2020). Social and economic challenges to community-based sea cucumber mariculture development in New Ireland Province, Papua New Guinea. *Marine Policy*, 117, p.103940.
- Halliday, I., Ley, J., Tobin, A., Garrett, R.N., Gribble, N.A., and Mayer, D.G. (2001). The effects of net fishing: addressing biodiversity and bycatch issues in Queensland inshore waters. State Queensland, Department of Primary Industries, and Fisheries Research and Development Corporation.
- Halliday, R.G. (1988). Use of seasonal spawning area closures in the management of haddock fisheries in the Northwest Atlantic. *NAFO Scientific Council Studies*, 12, pp.27-36.
- Halls, A.S., Mustafa, M.G., and Dickson, M. (2017). Community-based fisheries management approach adopted in Bangladesh. *Advances in Research* 11(6), pp.1-17.
- Hall-Spencer, J.M., Tasker, M., Soffker, M., Christiansen, S., Rogers, S., Campbell, M., and Hoydal, K. (2009). Design of Marine Protected Areas on high seas and territorial waters of Rockall Bank. *Marine Ecology Progress Series*, 397, pp.305-308.
- Hamilton, R.J., Ramohia, P., Hughes, A., Siota, C., Kere, N., Giningele, M., Kereseka, J., Taniveke, F., Tanito, N., Atu, W., and L. Tanavalu (2007). Post-Tsunami Assessment of Zinoa Marine Conservation Area, South Choiseul, Solomon Islands. TNC Pacific Island Countries Report No. 4/07. The Nature Conservancy, Indo-Pacific Resource Centre, South Brisbane, Australia.
- Hamilton, R.J., Gereniu, G., Kaniki, H. and Kereseka J. (2015). A report on periodic harvests at the Paspasbarego and Parama Locally Marine Managed Areas, Choiseul, Solomon Islands. The Nature Conservancy Pacific Division, Solomon Islands. 16 pp.
- Hamilton, R.J., Hughes, A., Brown, C.J., Leve, T., and Kama, W. (2019). Community-based management fails to halt declines of bumphead parrotfish and humphead wrasse in Roviana Lagoon, Solomon Islands. *Coral Reefs*, 38(3), pp.455-465.
- Haning, J. (2019). The Applicability of Customary Fisheries Management Principles for Managing Large-Scale Marine Areas: Rote Island, Indonesia. Doctoral dissertation. Massey University.
- Hart, D.R., Munroe, D.M., Caracappa, J.C., Haidvogel, D., Shank, B.V., Rudders, D.B., Klinck, J.M., Hofmann, E.E., Powell, E.N. (2020). Spillover of sea scallops from rotational

- closures in the Mid-Atlantic Bight (United States). *ICES Journal of Marine Science*, 77(5), pp.1992-2002.
- Hastings, J.G., Orbach, M.K., Karrer, L.B., and Kaufman, L. (2015). MMAS in Brazil. *Coastal Management*, 43(2), pp.122-137.
- Hastings, J.G., Orbach, M.K., Karrer, L.B., and Kaufman, L. (2015). MMAS in Fiji. *Coastal Management*, 43(2), pp.155-171.
- Higham, C.J. (2007). Modeling larval connectivity among coral habitats, *Acropora palmata* populations, and marine protected areas in the Florida Keys National Marine Sanctuary. Master's thesis. University of South Florida.
- Hill, L.S., Johnson, J.A., and Adamowski, J. (2016). Meeting Aichi Target 11: Equity considerations in marine protected areas design. *Ocean and Coastal Management*, 134, pp.112-119.
- Hobday, A.J., Game, E.T., Grantham, H.S., and Richardson, A.J. (2011). Missing Dimension—Conserving the largest habitat on Earth: protected areas in the pelagic ocean. In J. Caudet (Ed.), *Marine protected areas: a multidisciplinary approach*, pp.347-372. Cambridge University Press, Cambridge.
- Hoetjes, P.C., and Carpenter, K.E. (2010). Saving Saba Bank: policy implications of biodiversity studies. *Plos One*, 5(5), p.e10769.
- Hoffman, D.M. (2014). Conch, cooperatives, and conflict: conservation and resistance in the Banco Chinchorro Biosphere Reserve. *Conservation and society*, 12(2), pp.120-132.
- Hofman, R.J. (2017). Sealing, whaling and krill fishing in the Southern Ocean: past and possible future effects on catch regulations. *Polar Record*, 53(1), pp.88-99.
- Holmes, S.J., Bailey, N., Campbell, N., Catarino, R., Barratt, K., Gibb, A., and Fernandes, P.G. (2011). Using fishery-dependent data to inform the development and operation of a co-management initiative to reduce cod mortality and cut discards. *ICES Journal of Marine Science*, 68(8), pp.1679-1688.
- Hoq, M.E. (2007). An analysis of fisheries exploitation and management practices in Sundarbans mangrove ecosystem, Bangladesh. *Ocean and Coastal Management*, 50(5-6), pp.411-427.
- Horigue, V., Aliño, P.M., and Pressey, R.L. (2014). Evaluating management performance of marine protected area networks in the Philippines. *Ocean and coastal management*, 95, pp.11-25.
- Howard, M., Connolly, E., Taylor, E., and Mow, J.M. (2003). Community-based development of multiple-use marine protected areas: promoting stewardship and sharing responsibility for conservation in the San Andres Archipelago, Colombia. *Gulf and Caribbean research*, 14(2), pp.155-162.
- Huang, J.R., Brown, C.L., and Yang, T.B. (2011). Spatio-temporal patterns of crab fisheries in the main bays of Guangdong Province, China. *Iranian Journal of Fisheries Sciences*, 10(3), pp.425-436.
- Huntington, B. E., and Watson, J. L. (2017). Tailoring Ecological Monitoring to Individual Marine Reserves: Comparing Longline to Hook-and-Line Gear to Monitor Fish Species. *Marine and Coastal Fisheries*, 9(1), pp.432-440.



- Huvenne, V.A.I., Bett, B.J., Masson, D.G., Le Bas, T.P., and Wheeler, A.J. (2016). Effectiveness of a deep-sea cold-water coral Marine Protected Area, following eight years of fisheries closure. *Biological Conservation*, 200, pp.60-69.
- Islam, M.M., Nahiduzzaman, M., and Wahab, M.A. (2020). Fisheries co-management in hilsa shad sanctuaries of Bangladesh: Early experiences and implementation challenges. *Marine Policy*, 117, p.103955.
- Jablonski, S. (2007). The Brazilian sardine. Is there any room for modelling. *Pan-American Journal of Aquatic Sciences*, 2(2), pp.86-93.
- Jackson, G., and Moran, M. (2012). Recovery of inner Shark Bay snapper (*Pagrus auratus*) stocks: relevant research and adaptive recreational fisheries management in a World Heritage Property. *Marine and Freshwater Research*, 63(11), pp.1180-1190.
- Jackson, S.E., and Lundquist, C.J. (2016). Limitations of biophysical habitats as biodiversity surrogates in the Hauraki Gulf Marine Park. *Pacific Conservation Biology*, 22(2), pp.159-172.
- James, P.S.B.R., and James, D.B. (1994). Conservation and management of sea-cucumber resources of India. In K. Rengarajan, and D.B. James (Eds.), *Proceedings of the National Workshop on Beche-de-mer*. Bulletin of the Central Marine Fisheries Research Institute Vol. 46, pp. 23-26. Central Marine Fisheries Research Institute, Cochin, India.
- Januchowski-Hartley, F.A., Cinner, J.E., and Graham, N.A. (2014). Fishery benefits from behavioural modification of fishes in periodically harvested fisheries closures. *Aquatic Conservation: Marine and Freshwater Ecosystems*, 24(6), pp.777-790.
- Jiang, Y.Z., Cheng, J.H., and Li, S.F. (2009). Temporal changes in the fish community resulting from a summer fishing moratorium in the northern East China Sea. *Marine Ecology Progress Series*, 387, pp.265-273.
- Jimenez Castro, C. (2008). Management of a marine protected area by a local NGO in Honduras: its implications for local communities. Doctoral dissertation. Lincoln University.
- Jimenez, H., Bigot, L., Bourmaud, C., Chabanet, P., Gravier-Bonnet, N., Hamel, M.A., Payri, C., Mattio, L., Menou, J. L., Naeem, S., Rilwan, Y., Sattar, S., Scott, L., Shiham, A., Vigliola, L., Andréfouët, S. (2012). Multi-taxa coral reef community structure in relation to habitats in the Baa Atoll Man and Biosphere UNESCO Reserve (Maldives), and implications for its conservation. *Journal of sea research*, 72, pp.77-86.
- Jing, Y., Qiwei, H., and Pimao, C. (2018). Effect Evaluation of Summer Fishing Moratorium (SFM) In Daya Bay Based on Remote Sensing and Survey Data. *Animal Husbandry and Feed Science*, 10(4), pp.219-225.
- Johnson, D.E., Barrio Froján, C., Neat, F., Van Oevelen, D., Stirling, D., Gubbins, M.J., and Roberts, J.M. (2019). Rockall and Hatton: Resolving a super wicked marine governance problem in the High Seas of the northeast Atlantic Ocean. *Frontiers in Marine Science*, 6, pp.69.
- Johnson, D.R., Funicelli, N.A., and Bohnsack, J.A. (1999). Effectiveness of an existing estuarine no-take fish sanctuary within the Kennedy Space Center, Florida. *North American Journal of Fisheries Management*, 19(2), pp.436-453.
- Jørgensen, L., Bakke, G., and Hoel, A.H. (2020). Responding to global warming: new fisheries management measures in the Arctic. *Progress in Oceanography*, 188, p.102423.

- Juan, M.V., Darío Chávez, H., Juan Melchor, A., Ricardo, M.S., and José Alberto, R.P. (2012). Management for the white shrimp (*Litopenaeus vannamei*) from the southeastern Gulf of California through biomass models analysis. *Open Journal of Marine Science*, 2(1), pp.8-15.
- Jupiter, S.D., and Egli, D.P. (2011). Ecosystem-based management in Fiji: successes and challenges after five years of implementation. *Journal of Marine Biology* (2011), p.14.
- Jupiter, S.D., Weeks, R., Jenkins, A. P., Egli, D.P., and Cakacaka, A. (2012). Effects of a single intensive harvest event on fish populations inside a customary marine closure. *Coral Reefs*, 31(2), pp.321-334.
- Kamat, V. R. (2018). Dispossession and disenchantment: The micropolitics of marine conservation in southeastern Tanzania. *Marine Policy*, 88, pp.261-268.
- Kamat, V.R., Woo Kinshella, M.L. (2018). Food insecurity and coping strategies in a marine protected area in Southeastern Tanzania. *Ecology of food and nutrition*, 57(3), pp.187-205.
- Karfakis, T.N., and Karfaki, G.N. (2018). Setting priorities for addressing community historical rights and conserving biodiversity in the Inner Ionian Marine Protected Area, Greece. *Biodiversity*, 19(3-4), pp.206-215.
- Katikiro, R.E., Macusi, E.D., and Deepananda, K.A. (2015). Challenges facing local communities in Tanzania in realising locally-managed marine areas. *Marine Policy*, 51, pp.220-229.
- Katikiro, R.E., Kweka, O., Namkesa, F., Ponte, S., and Minja, R.A. (2017). Sustainability Partnerships for the Governance of Coastal Resources in Tanzania. NEPSUS Working Paper No. 17-5. Copenhagen Business School, Copenhagen, Denmark.
- Katikiro, R.E., Kweka, O.L., Minja, R., Namkesa, F., and Ponte, S. (2021). Stakeholder engagement and conservation outcomes in marine protected areas: Lessons from the Mnazi Bay-Ruvuma Estuary Marine Park (MBREMP) in Tanzania. *Ocean and Coastal Management*, 202, p.105502.
- Kazanidis, G., Vad, J., Henry, L. A., Neat, F., Berx, B., Georgoulas, K., and Roberts, J.M. (2019). Distribution of deep-sea sponge aggregations in an area of multisectoral activities and changing oceanic conditions. *Frontiers in Marine Science*, 6, p.163.
- Kelly, S., Scott, D., and MacDiarmid, A.B. (2002). The value of a spillover fishery for spiny lobsters around a marine reserve in northern New Zealand. *Coastal Management*, 30(2), pp.153-166.
- Kelly, S., MacDiarmid, A.B. (2003). Movement patterns of mature spiny lobsters, *Jasus edwardsii*, from a marine reserve. *New Zealand Journal of Marine and Freshwater Research*, 37(1), pp.149-158.
- Kenchington, E., Wang, Z., Lirette, C., Murillo, F. J., Guijarro, J., Yashayaev, I., and Maldonado, M. (2019). Connectivity modelling of areas closed to protect vulnerable marine ecosystems in the northwest Atlantic. *Deep Sea Research Part I: Oceanographic Research Papers*, 143, pp.85-103.
- Kendall, M.S. and K.A. Eschelbach. 2006. Boundary Options for a Research Area within Gray's Reef National Marine Sanctuary. Prepared by National Centers for Coastal Ocean Science (NCCOS) Biogeography Team in cooperation with the National Marine

- Sanctuary Program. NOAA Technical Memorandum NOS NCCOS 31. National Oceanic and Atmospheric Administration Coastal Services Center, Silver Spring, MD.
- Keppel, G., Morrison, C., Hardcastle, J., Rounds, I. A., Wilmott, I. K., Hurahura, F., and Shed, P. K. (2012). Conservation in tropical Pacific Island countries: case studies of successful programmes. *Parks*, 18(1), p.111.
- Kerr, J., DeSalles, P., Earle, S. A., Kikiloi, K. S., McCauley, D., MacPherson, R., Maxwell, S., Richmond, R., Roberts, C., Spies, N. P., Sumaila, U. R., Villagomez, A. (2016). The Cultural and Biological Significance of the proposed expansion for the Papahānaumokuākea Marine National Monument.
- Kerr, L.A., Hintzen, N. T., Cadrin, S. X., Clausen, L. W., Dickey-Collas, M., Goethel, D. R., Hatfield, E. M. C., Kritzer, J. P., Nash, R. D. M. (2017). Lessons learned from practical approaches to reconcile mismatches between biological population structure and stock units of marine fish. *ICES Journal of Marine Science*, 74(6), pp.1708-1722.
- Kessler, B. L. (2003). Marine protected area (MPA) process review case studies of five MPA establishment processes. National Marine Protected Areas Center, National Oceanic and Atmospheric Administration Coastal Services Center, Charleston, South Carolina, USA.
- Kikiloi, K., Friedlander, A.M., Wilhelm, A., Lewis, N.A., Quiocho, K., 'Āila Jr, W., and Kaho'ohalahala, S. (2017). Papahānaumokuākea: Integrating culture in the design and management of one of the world's largest marine protected areas. *Coastal Management*, 45(6), 436-451.
- Kincaid, K.B., Rose, G.A. (2014). Why fishers want a closed area in their fishing grounds: exploring perceptions and attitudes to sustainable fisheries and conservation 10 years post closure in Labrador, Canada. *Marine Policy*, 46, pp.84-90.
- Kincaid, K.B., Rose, G., Mahudi, H. (2014). Fishers' perception of a multiple-use marine protected area: Why communities and gear users differ at Mafia Island, Tanzania. *Marine Policy*, 43, pp.226-235.
- Kincaid, K., and Rose, G. (2017). Effects of closing bottom trawling on fisheries, biodiversity, and fishing communities in a boreal marine ecosystem: the Hawke Box off Labrador, Canada. *Canadian Journal of Fisheries and Aquatic Sciences*, 74(9), pp.1490-1502.
- Kirkbride-Smith, A.E., Wheeler, P.M., and Johnson, M.L. (2016). Artificial reefs and marine protected areas: a study in willingness to pay to access Folkestone Marine Reserve, Barbados, West Indies. *PeerJ*, 4, p.e2175.
- Kızılkaya, Z., Ünal, V., and Yıldırım, D. (2015). Three years' experience with small-scale fishers and no-take-zones in Gökova Bay (eastern Mediterranean), Turkey. In A. Srour, N. Ferri, D. Bourdenet, D. Fezzardi, and A. Nastasi (Eds.), *First regional symposium on sustainable small-scale fisheries in the Mediterranean and Black Sea, 27–30 November 2013 Saint Julian's, Malta*. FAO Fisheries and Aquaculture Proceedings No. 39, pp. 297-305. FAO, Rome, Italy.
- Kock, K.H., and Jones, C.D. (2005). Fish stocks in the southern Scotia Arc region—a review and prospects for future research. *Reviews in Fisheries Science*, 13(2), pp.75-108.
- Komoto, J., and Bruckner, A.W. (2009). Maui marine protected areas recreational management analysis. Professional Paper.

- Lamberth, S.J., Clark, B.M., and Bennett, B.A. (1995). Seasonality of beach-seine catches in False Bay, South Africa, and implications for management. *South African Journal of Marine Science*, 15(1), pp.157-167.
- Lathrop, R.G., Bogner, J., Buenaventura, E., Ciappi, M., Green, E., and Belton, T.J. (2017). Establishment of marine protected areas to reduce watercraft impacts in Barnegat Bay, New Jersey. *Journal of Coastal Research*, 78 (10078), pp.277-286.
- Le Port, A., Lavery, S., and Montgomery, J.C. (2012). Conservation of coastal stingrays: seasonal abundance and population structure of the short-tailed stingray *Dasyatis brevicaudata* at a Marine Protected Area. *ICES Journal of Marine Science*, 69(8), pp.1427-1435.
- Lebouvier, M. (2007). Conservation and management in the French sub-Antarctic islands and surrounding seas. *Papers and proceedings of the royal society of Tasmania*, 141 (1), pp.23-28.
- Levine, A. (2016). The development and unraveling of marine resource co-management in the Pemba Channel, Zanzibar: institutions, governance, and the politics of scale. *Regional environmental change*, 16(5), pp.1279-1291.
- Little, A.S., Needle, C.L., Hilborn, R., Holland, D.S., and Marshall, C.T. (2015). Real-time spatial management approaches to reduce bycatch and discards: experiences from Europe and the United States. *Fish and Fisheries*, 16(4), pp.576-602.
- Lloret, J., Zaragoza, N., Caballero, D., and Riera, V. (2008). Biological and socioeconomic implications of recreational boat fishing for the management of fishery resources in the marine reserve of Cap de Creus (NW Mediterranean). *Fisheries Research*, 91(2-3), pp.252-259.
- Long, S. (2017). Short-term impacts and value of a periodic no take zone (NTZ) in a community-managed small-scale lobster fishery, Madagascar. *PloS one*, 12(5), p.e0177858.
- Long, S., Thurlow, G., Jones, P.J., Turner, A., Randrianantenaina, S.M., Gammage, T., Savage, J., Ndriamanja, J.R. (2019). Critical analysis of the governance of the Sainte Luce locally managed marine area (LMMA), southeast Madagascar. *Marine Policy*, p.103691.
- Loper, C.E. (2008). Valuing networks of marine reserves: An assessment of recreational users' preferences for marine conservation in California's Channel Islands. Doctoral dissertation. University of Delaware.
- Lucrezi, S., Esfehiani, M.H., Ferretti, E., and Cerrano, C. (2019). The effects of stakeholder education and capacity building in marine protected areas: A case study from southern Mozambique. *Marine Policy*, 108, p.103645.
- MacKay, K.T. (2001). Managing fisheries for biodiversity: case studies of community approaches to fish reserves among the small island states of the Pacific. In *Blue Millennium: Managing Global Fisheries for Biodiversity Thematic Workshop*, Victoria, BC.
- Mahajan, S.L., and Daw, T. (2016). Perceptions of ecosystem services and benefits to human well-being from community-based marine protected areas in Kenya. *Marine Policy*, 74, pp.108-119.

- Maillet, G. (2013). Living and fishing in a marine protected area: balancing traditional fisheries with conservation in Karimunjawa National Park, Indonesia. Master's thesis. University of Montreal.
- Manap, M.G.B.A. (2016). Establishment of marine refugia in Malaysia: Conservation and protection of wild Penaeid shrimp stock in Baram, Sarawak and wild lobster population in Tanjung Leman, Johor. In K. Hajime, T. Iwata, Y. Theparoonrat, N. Manajit, and V.T. Sulit (Eds.) *Consolidating the Strategies for Fishery Resources Enhancement in Southeast Asia. Proceedings of the Symposium on Strategy for Fisheries Resources Enhancement in the Southeast Asian Region, Pattaya, Thailand, 27-30 July 2015*. Training Department, Southeast Asian Fisheries Development Center, Pattaya, Thailand.
- Manejar, A.J.A., Sandoy, L.M.H., and Subade, R.F. (2019). Linking marine biodiversity conservation and poverty alleviation: A case study in selected rural communities of Sagay Marine Reserve, Negros Occidental. *Marine Policy*, 104, pp.12-18.
- Mann, B.Q., Cowley, P.D., Dunlop, S.W., and Potts, W.M. (2018). Is catch-and-release shore angling compatible with the conservation goals of marine protected areas? A case study from the iSimangaliso Wetland Park in South Africa. *Fisheries Research*, 208, pp.179-188.
- Marrero, D. A. (2017). Ecology of sharks and human attitudes towards shark conservation in the Galapagos Marine Reserve. Doctoral dissertation. Massey University.
- Marsac, F., Galletti, F., Ternon, J.F., Romanov, E.V., Demarcq, H., Corbari, L., Bouchet, P., Roest, W.R., Jorry, S. J., Olu, K., Loncke, L., Robert, M. J., Ménard, F. (2020). Seamounts, plateaus and governance issues in the southwestern Indian Ocean, with emphasis on fisheries management and marine conservation, using the Walters Shoal as a case study for implementing a protection framework. *Deep Sea Research Part II: Topical Studies in Oceanography*, 176, p.104715.
- Marshak, A.R., Cebrian, J., Heck, K.L., Hightower, C.L., Kroetz, A.M., Macy, A., Madsen, S., Spearman, T., Sánchez-Lizaso, J.L. (2020). Spatiotemporal Dynamics of mediterranean shallow coastal fish communities along a gradient of marine protection. *Water*, 12(6), p.1537.
- Martell, S.J., Walters, C.J., and Wallace, S.S. (2000). The use of marine protected areas for conservation of lingcod (*Ophiodon elongatus*). *Bulletin of Marine Science*, 66(3), 729-743.
- Martin, A., Trouslard, E., Hautecoeur, M., Blettery, J., Moreau, C., Saucède, T., Améziane, N., Duhamel, G., Eléaume, M. (2017). Ecoregionalisation and conservation of benthic communities in the French exclusive economic zone of Kerguelen. In D. Welsford, J. Dell, and G. Duhamel (Eds.), *Second Symposium on Kerguelen Plateau Marine Ecosystems and Fisheries*. Australian Antarctic Division, Kingston, Tasmania, Australia.
- Martins, G.M., Jenkins, S.R., Hawkins, S.J., Neto, A.I., Medeiros, A.R., and Thompson, R.C. (2011). Illegal harvesting affects the success of fishing closure areas. *Journal of the Marine Biological Association of the United Kingdom*, 91(4), pp.929-937.
- Martin-Smith, K. (2009). A risk-management framework for avoiding significant adverse impacts of bottom fishing gear on vulnerable marine ecosystems. *CCAMLR Science*, 16, pp.177-193.

- Matos-Caraballo, D., and Agar, J.J. (2011). Census of active commercial fishermen in Puerto Rico: 2008. *Marine Fisheries Review*, 73(1), pp.13-27.
- Mazón-Suástegui, J.M., Betanzos-Vega, A., Isla-Molleda, M., Alzugaray-Martínez, R., García-Bernal, M., and Avilés-Quevedo, A. (2020). Training for Aquaculture and Fishery Activities for the Conservation and Sustainable Use of Biodiversity. In A. Ortega-Rubio, *Socio-ecological Studies in Natural Protected Areas*. Springer, Cham.
- McAndrews, R.S., Eich, A., Ford, A.K., Bejarano, S., Lal, R.R., and Ferse, S.C. (2019). Algae sediment dynamics are mediated by herbivorous fishes on a nearshore coral reef. *Coral Reefs*, 38(3), pp.431-441.
- McBride, M.M. (2010) Monitoring and Evaluating Spatially Managed Areas WP1. 1.2. Review of management tools that have been implemented internationally for SMAs. Working paper.
- McClanahan, T.R., Muthiga, N.A., Abunge, C., Kamukuru, A.T., Mwakalapa, E., and Kalombo, H. (2015). What happens after conservation and management donors leave? a before and after study of coral reef ecology and stakeholder perceptions of management benefits. *Plos one*, 10(10), p.e0138769.
- McClanahan, T.R. (2021). Marine reserve more sustainable than gear restriction in maintaining long-term coral reef fisheries yields. *Marine Policy*, 128, 104478.
- McCook, L.J., Ayling, T., Cappel, M., Choat, J.H., Evans, R.D., De Freitas, D.M., Heupel, M., Hughes, T.P., Jones, G.P., Mapstone, B., Marsh, H., Mills, M., Molloy, F.J., Pitcher, C.R., Pressey, R.L., Russ, G.R., Sutton, S., Sweatman, H., Tobin, R., Wachenfeld, D.R., Williamson, D.H. (2010). Adaptive management of the Great Barrier Reef: a globally significant demonstration of the benefits of networks of marine reserves. *Proceedings of the National Academy of Sciences*, 107(43), pp.18278-18285.
- McLean, B., Hikmany, A.N., Mangora, M., and Shalli, M. (2012). Legal and institutional framework for effective management of marine managed areas in Tanzania. Zanzibar Report. Marine Conservation Unit, Zanzibar, Tanzania.
- McLean, B., Jonathan, K., Jayshree, G., and Violet, N. (2014). Watamu Marine Tourism Management Operational Strategy. EcoAfrica Environmental Consultants.
- Mehta, R.S., Dale, K.E., and Higgins, B.A. (2020). Marine Protection Induces Morphological Variation in the California Moray, *Gymnothorax mordax*. *Integrative and Comparative Biology*, 60(2), pp.522-534.
- Mello, H.L., Smith, A.M., and Wood, A.C. (2021). Voluntary fishing restrictions alone do not promote growth of bryozoan-dominated biogenic habitat on the Otago shelf, southeastern New Zealand. *ICES Journal of Marine Science*, 78 (4), pp.1542-1553.
- Mendoza, M., García, T., and Baro, J. (2010). Using classification trees to study the effects of fisheries management plans on the yield of *Merluccius merluccius* (Linnaeus, 1758) in the Alboran Sea (Western Mediterranean). *Fisheries research*, 102(1-2), pp.191-198.
- Mesaki, S. (2020). Feasibility, Functioning and Future of MPAs in Mainland Tanzania: Evidence from Two Marine Parks. *Advances in oceanography and marine biology*, 1(5).
- Metaxas, A., Lacharite, M., and de Mendonca, S.N. (2019). Hydrodynamic connectivity of habitats of deep-water corals in Corsair Canyon, Northwest Atlantic: a case for cross-boundary conservation. *Frontiers in Marine Science*, 6, p.159.

- Meyer, C.G., Holland, K.N., Wetherbee, B.M., and Lowe, C.G. (2000). Movement patterns, habitat utilization, home range size and site fidelity of whitesaddle goatfish, *Parupeneus porphyreus*, in a marine reserve. *Environmental Biology of Fishes*, 59(3), pp.235-242.
- Meyer, C.G. (2003). An empirical evaluation of the design and function of a small marine reserve (Waikiki Marine Life Conservation District). Doctoral dissertation. University of Hawai'i.
- Miller, D.G.M (2011). Sustainable management in the Southern Ocean: CCAMLR science. Science diplomacy: Antarctica, science, and the governance of international spaces. In P.A. Berkman, M.A. Lang, D.W.H. Walton, and O.R Young (Eds.), *Science Diplomacy: Antarctica, Science, and the Governance of International Spaces*. Smithsonian Institution Scholarly Press, Washington, D.C., USA.
- Miller, D.G.M (2014). Antarctic marine living resources: 'The future is not what it used to be'. In T. Tin, D. Liggett, P. Maher, and M. Lamers (Eds.), *Antarctic Futures*. Springer, Dordrecht.
- Miller, D.G.M., and Slicer, N.M. (2014). CCAMLR and Antarctic conservation: The leader to follow?. In S. M. Garcia, J. Rice, and A. Charles (Eds.), *Governance of marine fisheries and biodiversity conservation: interaction and co-evolution*. John Wiley & Sons, Chichester, West Sussex, UK.
- Miller, E.A., Driggs, M.D., Desrosiers, M.E., and Yao, H.W. (2005). A critical evaluation of challenges to marine protected areas in Puerto Rico. Project Report. Worcester Polytechnic Institute.
- Miller, S.L. (2008). A Quantitative Assessment of Ra'ui (a Traditional Approach to Marine Protected Areas) on the Fishes and Invertebrates of Rarotonga, Cook Islands. Doctoral dissertation. Victoria University of Wellington.
- Miotto, M.L., Carvalho, B.M.D., and Spach, H. L. (2017). Does the closed fishing season influence the ichthyofauna consumed by *Larus dominicanus*?. *Brazilian Journal of Oceanography*, 65, pp.9-18.
- Moland, E., Olsen, E.M., Knutsen, H., Knutsen, J.A., Enersen, S.E., André, C., and Stenseth, N.C. (2011). Activity patterns of wild European lobster *Homarus gammarus* in coastal marine reserves: implications for future reserve design. *Marine Ecology Progress Series*, 429, pp.197-207.
- Mormede, S., Dunn, A., Parker, S., and Hanchet, S. (2017). Using spatial population models to investigate the potential effects of the Ross Sea region Marine Protected Area on the Antarctic toothfish population. *Fisheries Research*, 190, pp.164-174.
- Mozumder, M.M.H., Wahab, M., Sarkki, S., Schneider, P., and Islam, M.M. (2018). Enhancing social resilience of the coastal fishing communities: A case study of hilsa (*Tenualosa ilisha* H.) fishery in Bangladesh. *Sustainability*, 10(10), p.3501.
- Muhando, C.A. (2011). Biophysical Features in the Northern Tanga Marine Reserves, Tanzania. Marine Parks and Reserves Unit, Dar es salaam, Tanzania.
- Mühlig-Hofmann, A. (2007). Local marine resource management: the role of Fijian villagers in co-managing a small-scale fishery. *Maritime Stud*, 6, pp.57-81.

- Munga, C.N. (2008). Ecological and Socio-economic Assessment of Mombasa Marine Park and Reserve, Kenya. Doctoral dissertation. Vrije Universiteit Brussel.
- Muralidharan, R. (2017). "What the 45-day annual fishing ban in Tamil Nadu means for fisheries conservation". *The Wire*. April 15 [online]. Available at: <https://thewire.in/environment/45-day-fishing-ban-trawler-tamil-nadu>
- Murillo, F.J., Kenchington, E., Sacau-Cuadrado, M. D. M., Piper, D. J. W., Wareham, V., and Muñoz, A. (2011). New VME indicator species (excluding corals and sponges) and some potential VME elements of the NAFO Regulatory Area. NAFO SCR Document 11/73, Serial No. N6003. Northwest Atlantic Fisheries Organization.
- Murillo, F.J., Kenchington, E., Koen-Alonso, M., Guijarro, J., Kenchington, T.J., Sacau, M., Beazley, L., Rapp, H.T. (2020). Mapping benthic ecological diversity and interactions with bottom-contact fishing on the Flemish Cap (northwest Atlantic). *Ecological Indicators*, 112, p.106135.
- Murray, R. (2021). A governance analysis of three MPAs in Belize: Conservation objectives compromised by tourism development priorities?. *Marine Policy*, 127, p.104243.
- Musiello-Fernandes, J., Zappes, C.A., and Hostim-Silva, M. (2017). Small-scale shrimp fisheries on the Brazilian coast: Stakeholders perceptions of the closed season and integrated management. *Ocean and Coastal Management*, 148, pp.89-96.
- Ndobe, S., Moore, A., Yasir, I., and Jompa, J. (2019, April). Banggai cardinalfish conservation: Priorities, opportunities, and risks. In IOP Conference Series: *Earth and Environmental Science*, 253(1), p. 012033.
- Needham, M. D., Szuster, B.W., and Bell, C.M. (2011). Encounter norms, social carrying capacity indicators, and standards of quality at a marine protected area. *Ocean and coastal management*, 54(8), pp.633-641.
- Needle, C.L., and Catarino, R. (2011). Evaluating the effect of real-time closures on cod targeting. *ICES Journal of Marine Science*, 68(8), pp.1647-1655.
- Nguyen, A. (2020). Ocean Plastics: How marine litter shapes the lives of residents of Cu Lao Cham Marine Protected Area, Vietnam. Master's thesis. University of Guelph.
- Nguyen, D., Kereseka, J. (2008). Tarevalata 'Kastom' Conserved Area Chivoko, Lauru Island, Solomon Islands. In Lauru Land Conference of Tribal Communities, Solomon Islands. IUCN, Switzerland.
- Nichol, S. L., Howard, F. J. F., Kool, J., Stowar, M., Bouchet, P., Radke, L., Siwabessy, J., Przeslawski, R., Picard, K., Alvarez de Glasby, B., Colquhoun, J., Letessier, T., Heyward, A. (2013). Oceanic shoals commonwealth marine reserve (timor sea) biodiversity survey. GA0339/SOL5650, Post-survey report. Record, 38.
- Nielsen, E., and Gjertsen, H. (2010). Case studies of three economic incentive approaches in marine conservation. Conservation International, Arlington, USA.
- Nikitine, J., Wilson, A. M. W., and Dawson, T. P. (2018). Developing a framework for the efficient design and management of large scale marine protected areas. *Marine Policy*, 94, 196-203.
- Nilsson, J. A., Fulton, E. A., Haward, M., and Johnson, C. (2016). Consensus management in Antarctica's high seas—Past success and current challenges. *Marine Policy*, 73, 172-180.



- NOAA, United States Fish and Wildlife Service, Hawai'i Department of Land and Natural Resources (2008). *Papahānaumokuākea Marine National Monument: Final Environmental Assessment*.
- Notarbartolo-di-Sciara, G., Agardy, T., Hyrenbach, D., Scovazzi, T., and Van Klaveren, P. (2008). The Pelagos sanctuary for Mediterranean marine mammals. *Aquatic Conservation: Marine and Freshwater Ecosystems*, 18(4), pp.367-391.
- Novak, A.J., Becker, S.L., Finn, J.T., Danylchuk, A.J., Pollock, C.G., Hillis-Starr, Z., and Jordaan, A. (2020). Inferring residency and movement patterns of horse-eye jack *Caranx latus* in relation to a Caribbean marine protected area acoustic telemetry array. *Animal Biotelemetry*, 8(1), pp.1-13.
- Ntiamoa-Baidu, Y. (1991). Conservation of coastal lagoons in Ghana: the traditional approach. *Landscape and Urban Planning*, 20(1-3), pp.41-46.
- Ntiamoa-Baidu, Y. (2008). Indigenous Beliefs and Biodiversity Conservation: The Effectiveness of Sacred Groves, Taboos and Totems in Ghana for Habitat and Species Conservation. *Journal for the Study of Religion, Nature and Culture*, 2(3).
- O'Garra, T. (2007). Estimating the Total Economic Value (TEV) of the Navakavu LMMA (Locally Managed Marine Area) in Viti Levu Island (Fiji). Coral Reef Initiative for the South Pacific Programme, University of the South Pacific, Suva.
- Obura, D., Donner, S., Walsh, S., Mangubhai, S., and Rotjan, R. (2016). Phoenix Islands Protected Area Climate Change Vulnerability Assessment and Management. Report to the New England Aquarium. New England Aquarium, Boston, USA.
- Ofori-Danson, P.K., Asiedu, B., Amponsah, S.K.K., and Crawford, B. (2019). Assessment of the Socio-Economic, Food Security and Nutrition Impacts of the 2019 Canoe Fishery Closed Fishing Season in Ghana. USAID/Ghana Sustainable Fisheries Management Project. Coastal Resources Center, Graduate School of Oceanography, University of Rhode Island, Narragansett, RI, USA.
- Oleson, K. (2011) TEEB case: Taking an Ecosystem Service Perspective in Velondriake Locally Managed Marine Area.
- Olson, J.C., Appeldoorn, R.S., Schärer-Umpierre, M.T., and Cruz-Motta, J.J. (2019). Recovery when you are on your own: Slow population responses in an isolated marine reserve. *Plos one*, 14(10), p.e0223102.
- Oro, D. (1996). Interspecific kleptoparasitism in Audouin's Gull *Lams audouinii* at the Ebro Delta, northeast Spain: a behavioural response to low food availability. *Ibis*, 138(2), pp. 218-221.
- Oro, D., Genovart, X., Ruiz, X., Jiménez, J., and Garcia-Gans, J. (1996). Differences in diet, population size and reproductive performance between two colonies of Audouin's Gull *Larus audouinii* affected by a trawling moratorium. *Journal of avian biology*, 27, pp.245-251.
- Oro, D., Jover, L., and Ruiz, X. (1996). Influence of trawling activity on the breeding ecology of a threatened seabird, Audouin's gull *Larus audouinii*. *Marine Ecology Progress Series*, 139, 19-29.

- Oro, D. (1999). Trawler discards: a threat or a resource for opportunistic seabirds. In N.J Adams, R.H. Slotow (Eds.), *Proceedings of the 22nd International Ornithological Congress, August 1998, Durban, South Africa*. University of Natal, Durban, South Africa.
- Oro, D., Ruiz, X., Jover, L., Pedrocchi, V., and González-Solís, J. (1997). Diet and adult time budgets of Audouin's Gull *Larus audouinii* in response to changes in commercial fisheries. *Ibis*, 139(4), pp.631-637.
- Oviedo, P. (1999). Galapagos Islands: conflict management in conservation and sustainable resource management. In D. Buckles (Ed.), *Cultivating peace: Conflict and collaboration in natural resource management*. IDRC, Ottawa, ON, Canada.
- Owusu, V., and Andriesse, E. (2020). From open access regime to closed fishing season: Lessons from small-scale coastal fisheries in the Western Region of Ghana. *Marine Policy*, 121, p.104162.
- Pascal N. (2011). Cost-Benefit analysis of community-based marine protected areas: 5 case studies in Vanuatu, South Pacific. Research report. CRISP-CRIOBE (EPHE/CNRS), Moorea, French Polynesia.
- Patankar, V., D'Souza, E., Alcoverro, T., and Arthur, R. (2016). For traditional island communities in the Nicobar archipelago, complete no-go areas are the most effective form of marine management. *Ocean and Coastal Management*, 133, pp.53-63.
- Paterson, A.M., Vilalta, M., and Dies, J.I. (1992). Partial breeding failure of Audouin's Gull in two Spanish colonies in 1991. *British Birds*, 85(3), pp.97-100.
- Paukstyte, I. (2015). Between conservation and poverty: impact assessment of a fisheries management project in Madagascar. Master's thesis. Norwegian University of Life Sciences.
- Pawson, M.G., Pickett, G.D., and Smith, M.T. (2005). The role of technical measures in the recovery of the UK sea bass (*Dicentrarchus labrax*) fishery 1980–2002. *Fisheries research*, 76(1), pp.91-105.
- Peckett, F.J., Glegg, G.A., and Rodwell, L.D. (2014). Assessing the quality of data required to identify effective marine protected areas. *Marine Policy*, 45, pp.333-341.
- Pendred, S., Fischer, A., and Fischer, S. (2016). Improved management effectiveness of a marine protected area through prioritizing performance indicators. *Coastal management*, 44(2), pp.93-115.
- Penney, A.J., Parker, S.J., and Brown, J.H. (2009). Protection measures implemented by New Zealand for vulnerable marine ecosystems in the South Pacific Ocean. *Marine Ecology Progress Series*, 397, pp.341-354.
- Penney, A.J., and Guinotte, J.M. (2013). Evaluation of New Zealand's high-seas bottom trawl closures using predictive habitat models and quantitative risk assessment. *PLoS One*, 8(12), p.e82273.
- Pérez-Jorge, S., Pereira, T., Corne, C., Wijtten, Z., Omar, M., Katello, J., Kinyua, M., Oro, D., Louzao, M. (2015). Can static habitat protection encompass critical areas for highly mobile marine top predators? Insights from coastal East Africa. *PLoS One*, 10(7), p.e0133265.
- Pham, C.K., Murillo, F.J., Lirette, C., Maldonado, M., Colaço, A., Ottaviani, D., and Kenchington, E. (2019). Removal of deep-sea sponges by bottom trawling in the Flemish

- Cap area: conservation, ecology and economic assessment. *Scientific reports*, 9(1), pp.1-13.
- Pipitone, C., Badalamenti, F., Fernández, T.V., and D'Anna, G. (2014). Spatial management of fisheries in the Mediterranean Sea: problematic issues and a few success stories. *Advances in marine biology*, 69, pp.371-402.
- Pita, C., Horta e Costa, B., Franco, G., Coelho, R., Sousa, I., Gonçalves, E.J., Gonçalves, E.J., Erzini, K. (2020). Fisher's perceptions about a marine protected area over time. *Aquaculture and Fisheries*, 5(5), pp.273-281.
- Poursanidis, D., Traganos, D., Teixeira, L., Shapiro, A., and Muaves, L. (2021). Cloud-native seascape mapping of Mozambique's Quirimbas National Park with Sentinel-2. *Remote Sensing in Ecology and Conservation*, 7(2), pp.275-291.
- Power, G. (1979). Problems of fisheries management in northern Quebec. *Aquaculture Research*, 10(3), pp.101-109.
- Price, S.C. (2018). World Heritage Conservation in the Pacific: The Case of Solomon Islands. Springer Nature Singapore, Singapore, Singapore.
- Przeslawski, R., Alvarez, B., Kool, J., Bridge, T., Caley, M. J., and Nichol, S. (2015). Implications of sponge biodiversity patterns for the management of a marine reserve in northern Australia. *PLoS One*, 10(11), p.e0141813.
- Quiroz, G.R., Noriega, E.A.A., Valenzuela-Quinónez, W., and Leal, H.M.E. (2010). Artisanal fisheries in the conservation zones of the Upper Gulf of California. *Revista de biología marina y oceanografía*, 45(1), pp.89-98.
- Rabukawaqa, A. (2019). Indigenous fishing user [Tenure] rights and traditional marine management: Namena marine reserve. In J. Kitolelei, S. Einarsson, H.J. Lord, T. Ogawa (Eds.), *Global Conference on Tenure and User Rights in Fisheries 2018: Achieving Sustainable Development Goals by 2030, Yeosu, Republic of Korea, 10–14 September 2018*. FAO Fisheries and Aquaculture Proceedings. FAO, Rome, Italy.
- Race, S. (2011). The characteristics and experiences of summer visitors to Goat Island Marine Reserve, New Zealand. Master's thesis. Auckland University of Technology.
- Rajagopalan R (2008) Marine protected areas in India. Samudra Monograph. ICSF, Chennai.
- Rakitin, A., and Kramer, D.L. (1996). Effect of a marine reserve on the distribution of coral reef fishes in Barbados. *Marine Ecology Progress Series*, 131, pp.97-113.
- Ramesh, C.H., Koushik, S., Shunmugaraj, T., and Murthy, M.R. (2020). Current biodiversity of Mandapam group of Islands in Gulf of Mannar Marine Biosphere Reserve, Southeast coast of Tamil Nadu, India. *Regional Studies in Marine Science*, 39, p.101429.
- Ramesh, M., and Rai, N.D. (2017). Trading on conservation: A marine protected area as an ecological fix. *Marine Policy*, 82, pp.25-31.
- Ramirez, L. (2017). Marine Protected Areas In Colombia: Re-Connecting Social, Ecological, And Policy Aspects Through A Governance Perspective. Doctoral dissertation. Wilfrid Laurier University.
- Rangan, A.K., Rachel Pearlin, C.A.G., Jairaj, C.B., Rama Lakshmi Mahadevan, C.A.G., Sridhar, C.A., and Atree, B. (2007) Assessing and enhancing legislative provisions for natural resource conservation in the gulf of Mannar. Final Report. Gulf of Mannar Biosphere Reserve Trust, Ramanathapuram, Tamil Nadu, India.

- Raycraft, J. (2019). "In search of a good life": Perspectives on village out-migration in a Tanzanian marine park. *Journal of Rural Studies*, 70, pp.36-48.
- Raycraft, J. (2019). Circumscribing communities: marine conservation and territorialization in southeastern Tanzania. *Geoforum*, 100, pp.128-143.
- Raycraft, J. (2019). Conserving poverty: destructive fishing gear use in a Tanzanian marine protected area. *Conservation and Society*, 17(3), pp.297-309.
- Raycraft, J. (2020). The (un) making of marine park subjects: Environmentalism and everyday resistance in a coastal Tanzanian village. *World Development*, 126, p.104696.
- Rees, S.E., Ashley, M., Evans, L., Mangi, S., Rodwell, L., Attrill, M., Langmead, O., Sheehan, E. Rees, A. (2016). An evaluation framework to determine the impact of the Lyme Bay Fisheries and Conservation Reserve and the activities of the Lyme Bay Consultative Committee on ecosystem services and human wellbeing. A report to the Blue Marine Foundation by research staff the Marine Institute at Plymouth University. Plymouth University, Exeter University and Cefas.
- Renaud-Byrne, G. (2017). Social-Ecological Resilience to Climate Change: A Case Study of the Sandy Island Oyster Bed Marine Protected Area. Master's project. Dalhousie University.
- Rieser, A., Watling, L., and Guinotte, J. (2013). Trawl fisheries, catch shares and the protection of benthic marine ecosystems: Has ownership generated incentives for seafloor stewardship? *Marine Policy*, 40, pp.75-83.
- Rife, A.N., Aburto-Oropeza, O., Hastings, P.A., Erisman, B., Ballantyne, F., Wielgus, J., Sala, E., Gerber, L. (2013). Long-term effectiveness of a multi-use marine protected area on reef fish assemblages and fisheries landings. *Journal of Environmental Management*, 117, pp.276-283.
- Rocchi, M., Scotti, M., Micheli, F., and Bodini, A. (2017). Key species and impact of fishery through food web analysis: a case study from Baja California Sur, Mexico. *Journal of Marine Systems*, 165, pp.92-102.
- Rocliffe, S. (2015). Scaling and Sustaining Locally Managed Marine Areas. Doctoral dissertation. University of York.
- Rocliffe, S., and Harris, A. (2016). Experiences of periodic closures in small-scale invertebrate fisheries. Blue Ventures Conservation Report. Blue Ventures, London.
- Rodrigues, A.T., McKechnie, I., and Yang, D.Y. (2018). Ancient DNA analysis of Indigenous rockfish use on the Pacific Coast: Implications for marine conservation areas and fisheries management. *PLoS One*, 13(2), p.e0192716.
- Rodriguez, A.G., and Fanning, L.M. (2017). Assessing Marine Protected Areas Effectiveness: A Case Study with the Tobago Cays Marine Park. *Open Journal of Marine Science*, 7(03), 379.
- Rodríguez-Rodríguez, D. (2018). Rapid assessment of protection and ecological effectiveness of the Spanish Fishing Reserve Network. *Marine Policy*, 90, pp.29-36.
- Rodríguez-Zaragoza, F.A., Ortiz, M., Berrios, F., Campos, L., de Jesús-Navarrete, A., Castro-Pérez, J., Hernández-Flores, A., García-Rivas, M., Fonseca-Peralta, F., Gallegos-Aguilar, E. (2016). Trophic models and short-term dynamic simulations for benthic-pelagic communities at Banco Chinchorro Biosphere Reserve (Mexican Caribbean): a conservation case. *Community Ecology*, 17(1), 48-60.

- Romano, C., Fanelli, E., D'anna, G., Pipitone, C., Vizzini, S., Mazzola, A., and Badalamenti, F. (2016). Spatial variability of soft-bottom macrobenthic communities in northern Sicily (Western Mediterranean): Contrasting trawled vs. untrawled areas. *Marine environmental research*, 122, pp.113-125.
- Rotjan, R., Jamieson, R., Carr, B., Kaufman, L., Mangubhai, S., Obura, D., Pierce, R., Rimón, B., Ris, B., Sandin, S., Shelley, P., Sumaila, U. R., Taei, S., Tausig, H., Teroroko, T., Thorrold, S., Wikgren, B., Toatu, T., Stone, G. (2014). Establishment, management, and maintenance of the Phoenix Islands protected area. *Advances in marine biology*, 69, pp.289-324.
- Routray, R.K., Behera, S.K., and Mohanta, R. Diversity and Distribution of Ichthyofuna at Gahirmatha coast. *Scholars Journal of Research in Agriculture and Biology*, 2(1).
- Ruddle, K. (1998). Traditional community-based coastal marine fisheries management in Viet Nam. *Ocean and Coastal Management*, 40(1), 1-22.
- Ruiz, X., Oro, D., Martínez-Vilalta, A., and Jover, L. (1996). Feeding ecology of Audouin's Gulls (*Larus audouinii*) in the Ebro delta. *Colonial Waterbirds*, 19 (1), pp.68-74.
- Russ, G.R., Alcalá, A.C., Maypa, A.P., Calumpong, H.P., and White, A.T. (2004). Marine reserve benefits local fisheries. *Ecological applications*, 14(2), 597-606.
- Sáenz-Arroyo, A., Torre, J., Bourillón, L., and Kleiberg, M. (2005). A community-based marine reserve network in North-western Mexico. *In Proceedings of the Symposium and Workshop of the North Loreto, Baja California Sur, México. March 1 – 3*. North American Commission for Environmental Cooperation.
- Saikliang, P. (2014). Development of closed seasons and areas in the Gulf of Thailand. *Journal of the Marine Biological Association of India*, 56(1), pp.70-76.
- Sallam, W., and Gab-Alla, A. (2010). Some biological aspects of the portunid crab *Charybdis natator* from the Gulf of Suez, Red sea. *Egyptian Journal of Aquatic Biology and Fisheries*, 14(2), pp.39-51.
- Salomon, A.K., Gaichas, S.K., Jensen, O.P., Agostini, V.N., Sloan, N.A., Rice, J., McClanahan, T., Ruckelshaus, M.H., Levin, P.S., Dulvy, N.K., Babcock, E.A. (2011). Bridging the divide between fisheries and marine conservation science. *Bulletin of Marine Science*, 87(2), pp.251-274.
- Sampang, A. (2007). The Calamian Tagbanwa ancestral domain (Coron Island, Palawan, Philippines): evaluation of traditional fishing practices towards biodiversity conservation and sustainability. World Fish Center.
- Samy-Kamal, M., Forcada, A., and Lizaso, J.L.S. (2015). Effects of seasonal closures in a multi-specific fishery. *Fisheries Research*, 172, pp.303-317.
- Santos, R.D.C., Silva, S.L.R.D., Costa, R.C.D., Davanzo, T.M., and Hirose, G.L. (2017). Evaluation of the management plan for penaeid shrimps in the continental shelf of Sergipe, *Boletim do Instituto de Pesca*, 43, pp.308-321.
- Sargeant, J.P. (2015). Assessing the cooperative management regime in Gwaii Haanas national park reserve, national marine conservation area reserve and Haida heritage site. Master's thesis. University of Akureyri.
- Schejter, L., Rimondino, C., Chiesa, I., De Astarloa, J.M.D., Doti, B., Elías, R., Escolar, M., Genzano, G., López-Gappa, J., Tatián, M., Zelaya, D.G., Cristobo, J., Perez, C.D.,

- Cordeiro, R.T., Bremec, C.S. (2016). Namuncurá Marine Protected Area: an oceanic hot spot of benthic biodiversity at Burdwood Bank, Argentina. *Polar Biology*, 39(12), pp.2373-2386.
- Schmiing, M., Milla, D., Santos, M., and Afonso, P. Progress in marine coastal conservation in the Azores. In H. von Nordheim, and K.W. Goerke (Eds.), *Progress in Marine Conservation in Europe 2015: Proceedings of the Conference Stralsund, Germany, 14 - 18 September*. Federal Agency for Nature Conservation, Putbus, Germany.
- Schreiber, M. A. (2011). The evolution of legal instruments and the sustainability of the Peruvian anchovy fishery. *Marine Policy*, 36(1), pp.78-89
- Scocca, G. (2020). The Preservation of Coral Reefs as a Key Step for Healthy and Sustainable Oceans: The Belize Case. *Journal of International Wildlife Law and Policy*, 23(1), pp.27-43.
- Shackell, N.L., Keith, D.M., and Lotze, H.K. (2021). Challenges of Gauging the Impact of Area-Based Fishery Closures and OECMs: A Case Study Using Long-Standing Canadian Groundfish Closures. *Frontiers in Marine Science*, 8, p.334.
- Shapiro, A., Poursanidis, D., Traganos, D., Teixeira, L., and Muaves, L. (2020). Mapping and Monitoring the Quirimbas National Park Seascape. WWF-Germany, Berlin, Germany.
- Sheppard, C.R.C., Ateweberhan, M., Bowen, B. W., Carr, P., Chen, C.A., Clubbe, C., Craig, M.T., Ebinghaus, R., Eble, J., Fitzsimmons, N., Gaither, M.R., Gan, C.H., Gollock, M., Guzman, N., Graham, N.A.J, Harris, A., Jones, R., Keshavmurthy, S., Holdewey, H., Lundin, C.G., Mortimer, J.A., Obura, D., Pfeiffer, M., Price, A.R.G., Purkis, S., Raines, P., Readman, J.W., Riegl, B., Rogers, A., Schleyer, M., Seaward, M.R.D., Sheppard, A.L.S., Tamelander, J., Turner, J.R., Visram, S., Vogler, C., Vogt, S., Wolschke, H., Yang, J.M.C., Yang, S.Y., Yesson, C. (2012). Reefs and islands of the Chagos Archipelago, Indian Ocean: why it is the world's largest no-take marine protected area. *Aquatic Conservation: marine and freshwater ecosystems*, 22(2), pp.232-261.
- Shivlani, M., Leeworthy, V.R., and Murray, N.T.J. (2002). Socioeconomic monitoring of commercial fisheries in the Florida keys national marine sanctuary (FKNMS): major findings from the first four years, 1997-2000. In *Proceedings of the Coastal Society 18<sup>th</sup> International Conference, Galveston, Texas, May 19 – 22*. Coastal Society, Alexandria, USA.
- Silvano, R.A., Nora, V., Andreoli, T.B., Lopes, P.F., and Begossi, A. (2017). The ‘ghost of past fishing’: small-scale fisheries and conservation of threatened groupers in subtropical islands. *Marine Policy*, 75, pp.125-132.
- Smith, A.K., and Pollard, D.A. (1996). The best available information—some case studies from NSW, Australia, of conservation-related management responses which impact on recreational fishers. *Marine Policy*, 20(3), pp.261-267.
- Smolowitz, R., Siemann, L.A., Huntsberger, C., and Boelke, D. (2016). Application of seasonal closures to reduce flatfish bycatch in the US Atlantic sea scallop fishery. *Journal of shellfish research*, 35(2), pp.475-480.
- Som, M. (2015). Developing a Draft Management Plan for the Dike Rock Intertidal Area Scripps Coastal Reserve, La Jolla, California. Capstone project. University of California, San Diego.

- Spear, B., and Cannon, J. (2012). Benthic protection areas: best practices and recommendations. Sustainable Fisheries Partnership.
- Srinivasan, M., Badhul Haq, M.A., Yogaraj, G., and Balakrishnan, S. (2008). Grouper Fish Biodiversity in Gulf of Mannar Biosphere Reserve. In S. Kannaiyan, and K. Venkataraman (Eds.), *Biodiversity Conservation in Gulf of Mannar Biosphere Reserve*. National Biodiversity Authority, Chennai, Tamil Nadu, India.
- Stalio, M. (2016). Ecosystem management: Evaluating the impact of Marine Protected Areas on local communities in Kia, Fiji. A case study. Master's thesis. University of Kent.
- Starr, R.M., Cope, J.M., and Kerr, L.A. (2002). Trends in Fisheries and Fishery Resources. California Sea Grant College Program. University of California, San Diego, La Jolla, California.
- STECF. (2011). Evaluation of multi-annual plans for cod in Irish Sea, Kattegat, North Sea, and West of Scotland (STECF-11-07). European Union, Luxembourg, Luxembourg.
- Steenbergen, D. (2013). Negotiating the future of local 'backwaters': Participatory marine conservation on small Islands in Eastern Indonesia. Doctoral dissertation. Murdoch University.
- Stelzenmüller, V., Maynou, F., and Martín, P. (2009). Patterns of species and functional diversity around a coastal marine reserve: a fisheries perspective. *Aquatic Conservation: Marine and Freshwater Ecosystems*, 19(5), pp.554-565.
- Stevens, P.W., and Sulak, K.J. (2001). Egress of adult sport fish from an estuarine reserve within Merritt Island National Wildlife Refuge, Florida. *Gulf of Mexico Science*, 19(2), p.1.
- Stewart, B.D., Howarth, L.M., Wood, H., Whiteside, K., Carney, W., Crimmins, É., O'Leary, B. C., Hawkins, J.P., Roberts, C.M. (2020). Marine conservation begins at home: how a local community and protection of a small bay sent waves of change around the UK and beyond. *Frontiers in Marine Science*, 7.
- Sunde, J., and Isaacs, M. (2008). Marine conservation and coastal communities: who carries the costs?: a study of marine protected areas and their impact on traditional small-scale fishing communities in South Africa. International Collective in Support of Fishworkers, Chennai, Tamil Nadu, India.
- Suuronen, P., Jounela, P., and Tschernij, V. (2010). Fishermen responses on marine protected areas in the Baltic cod fishery. *Marine Policy*, 34(2), pp.237-243.
- Sykes, H., and Reddy, C. (2009). "Sacred Water"; 10 years of community managed marine protection supported by ecotourism-based income generation at Waitabu Marine Park, Fiji Islands. The 11th Pacific Science Inter-Congress, "Pacific Countries and their Ocean: Facing Local and Global Changes", March 2–6 2009, Tahiti, French Polynesia.
- Sys, K. (2018). Exploitation dynamics of the Belgian beam trawl fleet targeting hotspots of flatfish. Doctoral dissertation. Ghent University.
- Tamdrari, H., Brêthes, J.C., and Archambault, D. (2015). Spatio-temporal variations in demersal fish assemblages and diversity in the northern Gulf of St. Lawrence (Canada). *Marine Ecology*, 36(3), pp.557-571.
- Taylor, R.B., Morrison, M.A., and Shears, N.T. (2011). Establishing baselines for recovery in a marine reserve (Poor Knights Islands, New Zealand) using local ecological knowledge. *Biological Conservation*, 144(12), pp.3038-3046.

- Tewfik, A., Babcock, E. A., Gibson, J., Perez, V. R. B., and Strindberg, S. (2017). Benefits of a replenishment zone revealed through trends in focal species at Glover's Atoll, Belize. *Marine Ecology Progress Series*, 580, pp.37-56.
- Thaman, B., Thaman, R.R., Balawa, A., and Veitayaki, J. (2017). The recovery of a tropical marine mollusk fishery: a transdisciplinary community-based approach in Navakavu, Fiji. *Journal of ethnobiology*, 37(3), pp.494-513.
- Thaman, R.R., Fong, T., and Balawa, A. (2008). Biodiversity and ethnobiodiversity of finfishes of Vanua Navakavu, Viti Levu, Fiji Islands. SPRH - FIO Biodiversity and Ethnobiodiversity Report No. 4. The University of the South Pacific Suva, Fiji Islands.
- Thompson, A.R., Chen, D.C., Guo, L. W., Hyde, J.R., Watson, W. (2017). Larval abundances of rockfishes that were historically targeted by fishing increased over 16 years in association with a large marine protected area. *Royal Society open science*, 4(9), p.170639.
- Thompson, A., Sanders, J., Tandstad, M., Carocci, F., Fuller, J. (Eds.) (2016). Vulnerable marine ecosystems: processes and practices in the high seas. FAO Fisheries and Aquaculture Technical Paper No. 595.FAO, Rome, Italy
- Thompson, B.S., Bladon, A.J., Fahad, Z.H., Mohsanin, S., and Koldewey, H.J. (2016). Evaluation of the ecological effectiveness and social appropriateness of fishing regulations in the Bangladesh Sundarbans using a new multi-disciplinary assessment framework. *Fisheries Research*, 183, pp.410-423.
- Thornhill, D.J. (2012). Ecological impacts and practices of the coral reef wildlife trade. Defenders of Wildlife, Washington, DC, USA.
- Torres-Irineo, E., Dreyfus-León, M., Gaertner, D., Salas, S., and Marchal, P. (2017). Adaptive responses of tropical tuna purse-seiners under temporal regulations. *Ambio*, 46(1), pp.88-97.
- Turak, E., and DeVantier, L. (2012). Biodiversity and Conservation Priorities of Reef-building Corals in Timor Leste, with focus on the Nino Konis Santana National Marine Park. Conservation International.
- Turak, E., and DeVantier, L. (2013). Reef-building corals in Timor-Leste. In A Rapid Marine Biological Assessment of Timor-Leste. Conservation International.
- Usseglio, P., Schuhbauer, A., and Friedlander, A. (2014). Collaborative Approach to Fisheries Management as a Way to Increase the Effectiveness of Future Regulations in The Galapagos Archipelago. In J. Denkinger, and L Vinueza (Eds.), *The Galapagos Marine Reserve*. Springer, Cham.
- Vallerani, M. (2017). Empowered Participatory Governance and marine resources management: the case of two Locally Managed Marine Areas in Southern Kenya. Master's Thesis. Wageningen University.
- van Beukering, P., and Cesar, H. (2004). Economic Analysis of Marine Managed Areas in the Main Hawaiian Islands. Cesar Environmental Economics Consulting, Arnhem, Netherlands.
- van Beukering, P., Scherl, L., Sultanian, E., Leisher, C., and Fong, P. (2007). Case study 1: Yavusa Navakavu locally managed marine area (Fiji). The Nature Conservancy, Australian Department of the Environment and Water Resources, PREM, WWF.



- van Nimwegen, P. (2017). Shifting waters-Indonesia's dynamic marine protected area policy seascape. Master's thesis. Murdoch University.
- Veitayaki, J., Nakoro, A. D., Sigarua, T., and Bulai, N. (2011). On cultural factors and marine managed areas in Fiji. In J. Liston, Geoffrey Clark, and D. Alexander (Eds.), *Pacific Island Heritage Archaeology, Identity and Community*. The Australian National University, Canberra, Australia.
- Venkataraman, K. (2008). Overview of Marine Biodiversity Conservation in Tamil Nadu and Importance of Gulf of Mannar Biosphere Reserve. In S. Kannaiyan, K. Venkataraman (Eds.), *Conservation in Gulf of Mannar Biosphere Reserve*. National Biodiversity Authority, Chennai, Tamil Nadu, India.
- Verhoeven, D. (2016). The Role of Nursery Habitats in the Effectiveness of Marine Protected Areas in the Philippines. Master's report. Wageningen University.
- Vilas, D., Coll, M., Corrales, X., Steenbeek, J., Piroddi, C., Macias, D., Ligas, A., Sartor, P., Claudet, J. (2021). Current and potential contributions of the Gulf of Lion Fisheries Restricted Area to fisheries sustainability in the NW Mediterranean Sea. *Marine Policy*, 123, p.104296.
- Villaseñor-Derbez, J. C., Aceves-Bueno, E., Fulton, S., Suarez, A., Hernández-Velasco, A., Torre, J., and Micheli, F. (2019). An interdisciplinary evaluation of community-based TURF-reserves. *PloS one*, 14(8), p.e0221660.
- Vinther, M., and Eero, M. (2013). Quantifying relative fishing impact on fish populations based on spatio-temporal overlap of fishing effort and stock density. *ICES Journal of Marine Science*, 70(3), pp.618-627.
- Wagner, D., van der Meer, L., Gorny, M., Sellanes, J., Gaymer, C. F., Soto, E. H., Easton, E. E., Friedlander, A. M., Lindsay, D. J., Molodtsova, T.N., Boteler, B., Durussell, C., Gjerde, K.M., Currie, D., Gianni, M., Brooks, C.M., Shiple, M.J., Wilhelm, T.A., Quesada, M., Thomas, T., Dunstan, P.K., Clark, N.A., Villanueva, L.A., Pyle, R.L., Clark, M.R., Georgian, S.E., Morgan, L.E. (2021). The Salas y Gómez and Nazca ridges: A review of the importance, opportunities and challenges for protecting a global diversity hotspot on the high seas. *Marine Policy*, 126, p.104377.
- Walker, R.C., Ponce-Taylor, D.J., Comley, J., and Raines, P.S. (2006). The Use of a Coral Reef Conservation Management Value Rating to aid in the management of an artisanal fishery. 57th Gulf and Caribbean Fisheries Institute Conference.
- Wang, Y., Duan, L., Li, S., Zeng, Z., and Failler, P. (2015). Modeling the effect of the seasonal fishing moratorium on the Pearl River Estuary using ecosystem simulation. *Ecological Modelling*, 312, pp.406-416.
- Wang, Y., Hu, J., Pan, H., Li, S., and Failler, P. (2016). An integrated model for marine fishery management in the Pearl River Estuary: linking socio-economic systems and ecosystems. *Marine Policy*, 64, pp.135-147.
- Webster, F.J., Cohen, P.J., Tauati, M., Vidler, K., Mailau, S., Vaipuna, L., and Fatongiatau, V. (2017). Detecting fisheries trends in a co-managed area in the Kingdom of Tonga. *Fisheries Research*, 186, pp.168-176.
- Weeks, R., and Jupiter, S.D. (2013). Adaptive comanagement of a marine protected area network in Fiji. *Conservation Biology*, 27(6), pp.1234-1244.

- Westlund, L., Charles, A., Garcia, S.M., and Sanders, J. (Eds.) (2017). *Marine protected areas: Interactions with fishery livelihoods and food security*. FAO Fisheries and Aquaculture Technical Paper No. 603. FAO, Rome, Italy.
- Wheaton, J., Jaap, W. C., Porter, J.W., Kosminyn, V., Hackett, K., Lybolt, M., Callahan, M.K., Kidney, J., Kupfner, S., Tsokos, C., Yanev, G. (2001). EPA/FKNMS Coral Reef Monitoring Project. In *FKNMS symposium: an ecosystem report card*. Washington, DC, USA.
- White, A.T., and Vogt, H.P. (2000). Philippine coral reefs under threat: lessons learned after 25 years of community-based reef conservation. *Marine Pollution Bulletin*, 40(6), pp.537-550.
- Wiener, C.S., and Wagner, D. (2013). Sailing through time: a historical examination of the explorations and expeditions of the Papahānaumokuākea Marine National Monument. *Atoll Research Bulletin*, 594.
- Williams, A., Bax, N.J., Kloser, R.J., Althaus, F., Barker, B., and Keith, G. (2009). Australia's deep-water reserve network: implications of false homogeneity for classifying abiotic surrogates of biodiversity. *ICES Journal of Marine Science*, 66(1), pp. 214-224.
- Williams, A. (2011). Bottom fishery impact assessment Australian report for the South Pacific Regional. positions, 1, 3. Australian report for the South Pacific Regional Fisheries Management Organization (SPRFMO). CSIRO, Hobart, Tasmania, Australia.
- Williams, A., Schlacher, T.A., Rowden, A.A., Althaus, F., Clark, M.R., Bowden, D.A., Stewart, R., Bax, N.J., Consalvey, M., Kloser, R.J. (2010). Seamount megabenthic assemblages fail to recover from trawling impacts. *Marine Ecology*, 31, pp.183-199.
- Williams, A., Upston, J., Green, M., and Graham, K. (2016). Selective commercial line fishing and biodiversity conservation co-exist on seamounts in a deepwater marine reserve. *Fisheries Research*, 183, pp.617-624.
- Williams, C., Pearson-Ross, A., Duffill Telsnig, J., Johnston, E., Barnfield, T. Robet, V. (2021). The Canyons Marine Conservation Zone (MCZ) Marine Management Organisation (MMO) Fisheries Assessment.
- Williams, I.D., Walsh, W.J., Miyasaka, A., and Friedlander, A.M. (2006). Effects of rotational closure on coral reef fishes in Waikiki-Diamond head fishery management area, Oahu, Hawaii. *Marine ecology progress series*, 310, pp.139-149.
- Wilson, J. (2012). Beach Seining in Mozambique-Bane or Benefit?. In A.L. Shriver (Ed.), *Visible Possibilities: The Economics of Sustainable Fisheries, Aquaculture and Seafood Trade: Proceedings of the Sixteenth Biennial Conference of the International Institute of Fisheries Economics and Trade, July 16-20, Dar es Salaam, Tanzania*. Shriver. International Institute of Fisheries Economics and Trade (IIFET), Corvallis, Oregon, USA.
- Wilson, S.K., Graham, N.A., Fisher, R., Robinson, J., Nash, K., Chong-Seng, K., Polunin, N.V.C., Aumeeruddy, R., Quatre, R. (2012). Effect of macroalgal expansion and marine protected areas on coral recovery following a climatic disturbance. *Conservation Biology*, 26(6), pp.995-1004.
- Wing, S.R., and Jack, L. (2013). Marine reserve networks conserve biodiversity by stabilizing communities and maintaining food web structure. *Ecosphere*, 4(11), pp.1-14.

- Winter, K.B., Rii, Y.M., Reppun, F.A. W. L., DeLaforge Hintzen, K., Alegado, R.A., Bowen, B.W., Bremer, L.L., Coffman, M., Deenik, J.L., Donahue, M.J., Falinski, K.A., Frank, K., Franklin, E.C., Kurashima, N., Lincoln, N.K., Madin, E.M.P., McManus, M.A., Nelson, C. E., Okano, R., Olegario, A., Pascua, P., Oleson, K.L.L., Price, M.R., Rivera, M.A. J., Rodgers, K.S., Ticktin, T., Sabine, C.L., Smith, C.M., Hewett, A., Kaluhiwa, R., Cypher, M., Thomas, B., Leong, J-A., Kekuewa, K., Tanimoto, J., Kukea-Shultz, K., Kawelo, A.H., Kotubetey, K., Neilson, B.J., Lee, T. S., Toonen, R.J. (2020). Collaborative research to inform adaptive comanagement: a framework for the He'eia National Estuarine Research Reserve. *Ecology and Society*, 25(4).
- Wright, G., Ardron, J., Gjerde, K., Currie, D., and Rochette, J. (2015). Advancing marine biodiversity protection through regional fisheries management: a review of bottom fisheries closures in areas beyond national jurisdiction. *Marine Policy*, 61, pp.134-148.
- Yeon, I., Song, M.Y., Sohn, M.H., Hwang, H.J., Im, Y.J., Kim, D.H., Park, H. W, Zhang, C.I. (2011). An ecosystem-based assessment of the Korean blue crab trammel net fishery in the Yellow Sea and management implications. *Fisheries research*, 112(3), pp.179-188.
- Yıldız, T., Ulman, A., and Demirel, N. (2020). A comparison of market landings during fish spawning seasons to better understand the effectiveness of the temporal fishery closure in Turkey. *Ocean and Coastal Management*, 198, p.105353.
- Young, J. (2013). Samoan Safata District Customary User Rights Program. Environmental Defense Fund, Washington, DC, USA.
- Yu, J., Hu, Q., Yuan, H., Tong, F., Chen, P., and Mao, J. (2017). Effects assessment of summer fishing moratorium in Daya Bay in the Northern South China Sea. *Journal of Geoscience and Environment Protection*, 5(07), p.96.
- Yunitawati, D., and Clifton, J. (2019). Governance in the early stages of marine protected area development: A case study of Nusa Penida District Marine Conservation Area, Indonesia. *Marine Policy*, p.103653.
- Zeng, C. (2016). Patterns of genetic connectivity in deep-sea vulnerable marine ecosystems and implications for conservation. Doctoral dissertation. Victoria University of Wellington.
